# Supplementary material for: Systematic Cell Line-Based Identification of Drugs Modifying <i>ACE2</i> Expression
Source: Preprints.org preprint supplement (doi:10.20944/preprints202003.0446.v1), 2020-03-31
Supplement: Supplementary file 2 [file supplementary]

## Sheet: A_drug_and_cell_info
Table 1A. Information on the drugs and cell lines where they are tested on from CMAP dataset analyzed in this study
antihypertensive drugs	cells tested for antihypertensive drugs		anti-diabetic drugs	cells tested for anti diabetic drugs		all clinically approved drugs	cells tested for all approved drugs		all clinically approved drugs (extended)	cells tested for all approved drugs (extended)
indapamide	A549		repaglinide	A549		amisulpride	A549		amisulpride	A375
isradipine	MCF7		glipizide	MCF7		articaine	MCF7		articaine	A549
nicardipine	PC3		glimepiride	PC3		atovaquone	PC3		atovaquone	HA1E
ramipril	VCAP		gliquidone	VCAP		bromocriptine	VCAP		bromocriptine	HT29
torasemide			nateglinide			budesonide			budesonide	MCF7
aliskiren			pioglitazone			calcipotriol			calcipotriol	PC3
amlodipine			phenformin			chlortetracycline			chlortetracycline	VCAP
amiloride			rosiglitazone			cisapride			cisapride	HCC515
bisoprolol			tolazamide			citalopram			citalopram	ASC
benazepril			tolbutamide			clioquinol			clioquinol	NEU
chlorthalidone			sitagliptin			dihydroergotamine			dihydroergotamine	NPC
clonidine			acarbose			doxorubicin			doxorubicin	PHH
enalapril			miglitol			icosapent			icosapent	SKB
felodipine						ephedrine			ephedrine	HEPG2
fenoldopam						estriol			estriol	FIBRNPC
irbesartan						estrone			estrone	HEK293T
labetalol						eugenol			eugenol	NKDBA
losartan						ethotoin			ethotoin	HUH7
metolazone						etoposide			etoposide	HL60
metoprolol						fluorometholone			fluorometholone	U937
minoxidil						fluoxetine			fluoxetine	CD34
molsidomine						fursultiamine			fursultiamine	BT20
moxonidine						gemfibrozil			gemfibrozil	HS578T
nitrendipine						guaifenesin			guaifenesin	MCF10A
perindopril						guanabenz			guanabenz	MDAMB231
phentolamine						galantamine			galantamine	SKBR3
pindolol						haloperidol			haloperidol	JURKAT
prazosin						hexylresorcinol			hexylresorcinol	U266
quinapril						homatropine			homatropine
reserpine						hyoscyamine			hyoscyamine
sildenafil						huperzine-a			huperzine-a
spironolactone						ibuprofen			ibuprofen
telmisartan						imipramine			imipramine
valsartan						indapamide			indapamide
verapamil						isoxsuprine			isoxsuprine
lacidipine						isradipine			isradipine
fosinopril						liothyronine			liothyronine
bosentan						letrozole			letrozole
acebutolol						methoxsalen			methoxsalen
furosemide						methylergometrine			methylergometrine
guanadrel						minaprine			minaprine
guanethidine						maprotiline			maprotiline
hydroflumethiazide						metixene			metixene
lisinopril						metrizamide			metrizamide
methyldopa						metyrapone			metyrapone
doxazosin						molindone			molindone
ambrisentan						nabumetone			nabumetone
mecamylamine						nicardipine			nicardipine
						nicotine			nicotine
						nitrofural			nitrofural
						nalbuphine			nalbuphine
						naloxone			naloxone
						naltrexone			naltrexone
						ondansetron			ondansetron
						oxprenolol			oxprenolol
						pentobarbital			pentobarbital
						progesterone			progesterone
						phensuximide			phensuximide
						pirlindole			pirlindole
						quinethazone			quinethazone
						ramipril			ramipril
						repaglinide			repaglinide
						ritodrine			ritodrine
						solifenacin			solifenacin
						sulfinpyrazone			sulfinpyrazone
						simvastatin			simvastatin
						sotalol			sotalol
						tolazoline			tolazoline
						tranylcypromine			tranylcypromine
						triamcinolone			triamcinolone
						alimemazine			alimemazine
						triprolidine			triprolidine
						tropicamide			tropicamide
						tamoxifen			tamoxifen
						tetrabenazine			tetrabenazine
						tianeptine			tianeptine
						tocainide			tocainide
						torasemide			torasemide
						tropisetron			tropisetron
						warfarin			warfarin
						yohimbine			yohimbine
						zonisamide			zonisamide
						fluphenazine			fluphenazine
						thioridazine			mitoxantrone
						trifluoperazine			thioridazine
						vorinostat			trifluoperazine
						estradiol			vorinostat
						fulvestrant			albendazole
						sirolimus			alclometasone
						tretinoin			alfuzosin
						albendazole			aliskiren
						alclometasone			alprenolol
						alfuzosin			altretamine
						aliskiren			alverine
						alprenolol			amantadine
						altretamine			amcinonide
						alverine			aminoglutethimide
						amantadine			amiodarone
						amcinonide			amitriptyline
						aminoglutethimide			amlodipine
						amiodarone			amoxapine
						amitriptyline			amsacrine
						amlodipine			anagrelide
						amoxapine			alprostadil
						amsacrine			ambroxol
						anagrelide			amiloride
						alprostadil			amodiaquine
						ambroxol			bendroflumethiazide
						amiloride			benzthiazide
						amodiaquine			bepridil
						bendroflumethiazide			betahistine
						benzthiazide			betamethasone
						bepridil			bezafibrate
						betahistine			bicalutamide
						betamethasone			biperiden
						bezafibrate			bisacodyl
						bicalutamide			bisoprolol
						biperiden			bromhexine
						bisacodyl			brompheniramine
						bisoprolol			bumetanide
						bromhexine			bupropion
						brompheniramine			buspirone
						bumetanide			butoconazole
						bupropion			benazepril
						buspirone			oxybuprocaine
						butoconazole			benperidol
						benazepril			benzonatate
						oxybuprocaine			betaxolol
						benperidol			biotin
						benzonatate			brinzolamide
						betaxolol			caffeine
						biotin			carbamazepine
						brinzolamide			carbinoxamine
						caffeine			carprofen
						carbamazepine			carvedilol
						carbinoxamine			celecoxib
						carprofen			cetirizine
						carvedilol			chlorambucil
						celecoxib			proguanil
						cetirizine			chloroquine
						chlorambucil			chloroxine
						proguanil			chlorphenamine
						chloroquine			chlorpromazine
						chloroxine			chlorprothixene
						chlorphenamine			chlorthalidone
						chlorpromazine			cilostazol
						chlorprothixene			cimetidine
						chlorthalidone			clemastine
						cilostazol			clobetasol
						cimetidine			clofibrate
						clemastine			clomifene
						clobetasol			clonidine
						clofibrate			irinotecan
						clomifene			crotamiton
						clonidine			cyclopentolate
						irinotecan			cabergoline
						crotamiton			carteolol
						cyclopentolate			cefixime
						cabergoline			ceforanide
						carteolol			cefotiam
						cefixime			cilastatin
						ceforanide			cilnidipine
						cefotiam			cinalukast
						cilastatin			cinnarizine
						cilnidipine			ciprofibrate
						cinalukast			clofarabine
						cinnarizine			clomipramine
						ciprofibrate			clozapine
						clofarabine			dactinomycin
						clomipramine			danazol
						clozapine			desipramine
						dactinomycin			desoximetasone
						danazol			dexamethasone
						daunorubicin			dextromethorphan
						desipramine			benzydamine
						desoximetasone			diazepam
						dexamethasone			diclofenac
						dextromethorphan			dienestrol
						benzydamine			diethylcarbamazine
						diazepam			diethylstilbestrol
						diclofenac			diflunisal
						dienestrol			digitoxin
						diethylcarbamazine			digoxin
						diethylstilbestrol			diloxanide
						diflunisal			diltiazem
						diloxanide			dipyridamole
						diltiazem			disopyramide
						dipyridamole			doconexent
						disopyramide			domperidone
						doconexent			donepezil
						domperidone			doxepin
						donepezil			doxylamine
						doxepin			droperidol
						doxylamine			duloxetine
						droperidol			dantrolene
						duloxetine			daunorubicin
						dantrolene			diazoxide
						diazoxide			diclofenamide
						diclofenamide			diflorasone
						diflorasone			diphenidol
						diphenidol			dobutamine
						dobutamine			dosulepin
						dosulepin			dydrogesterone
						dydrogesterone			econazole
						econazole			enalapril
						enalapril			equilin
						equilin			erythromycin
						erythromycin			escitalopram
						escitalopram			estradiol
						etodolac			etodolac
						etomidate			etomidate
						exemestane			exemestane
						ezetimibe			ezetimibe
						epirizole			epirizole
						eplerenone			eplerenone
						esculin			esculin
						mestranol			mestranol
						famciclovir			famciclovir
						febuxostat			febuxostat
						fenbufen			fenbufen
						fenofibrate			fenofibrate
						fenoterol			fenoterol
						fexofenadine			fexofenadine
						finasteride			finasteride
						fluconazole			fluconazole
						flunarizine			flunarizine
						flunisolide			flunisolide
						flutamide			flutamide
						fluvastatin			fluvastatin
						felbamate			felbamate
						felodipine			felodipine
						fenoldopam			fenoldopam
						flavoxate			flavoxate
						flecainide			flecainide
						flucloxacillin			flucloxacillin
						flumazenil			flumazenil
						fluspirilene			fluspirilene
						fluticasone			fluticasone
						fluvoxamine			fluvoxamine
						formoterol			formoterol
						glipizide			glipizide
						guanfacine			guanfacine
						glimepiride			glimepiride
						gliquidone			gliquidone
						homosalate			homosalate
						hydrocortisone			hydrocortisone
						halcinonide			halcinonide
						hexylcaine			hexylcaine
						hydralazine			hydralazine
						irbesartan			irbesartan
						ivermectin			ivermectin
						ibudilast			ibudilast
						iobenguane			iobenguane
						isocarboxazid			isocarboxazid
						ketoprofen			ketoprofen
						ketorolac			ketorolac
						ketotifen			ketotifen
						labetalol			labetalol
						lidocaine			lidocaine
						losartan			losartan
						lovastatin			lovastatin
						loxapine			loxapine
						lamotrigine			lamotrigine
						leflunomide			leflunomide
						levocabastine			levocabastine
						loperamide			loperamide
						mebendazole			mebendazole
						mebeverine			mebeverine
						meclizine			meclizine
						medrysone			medrysone
						meloxicam			meloxicam
						menadione			menadione
						mephentermine			mephentermine
						mesoridazine			mesoridazine
						metaxalone			metaxalone
						methocarbamol			methocarbamol
						methysergide			methysergide
						metoclopramide			metoclopramide
						metolazone			metolazone
						metoprolol			metoprolol
						mexiletine			mexiletine
						midodrine			midodrine
						minoxidil			minoxidil
						mitotane			mitotane
						modafinil			modafinil
						meclocycline			meclocycline
						melperone			melperone
						methantheline			methantheline
						mianserin			mianserin
						mifepristone			mifepristone
						milrinone			milrinone
						mirtazapine			mirtazapine
						moexipril			moexipril
						molsidomine			molsidomine
						mometasone			mometasone
						moxonidine			moxonidine
						nadolol			nadolol
						naphazoline			naphazoline
						nateglinide			nateglinide
						nefopam			nefopam
						nicergoline			nicergoline
						niclosamide			niclosamide
						nilutamide			nilutamide
						nimodipine			nimodipine
						nitrendipine			nitrendipine
						nizatidine			nizatidine
						nonoxynol-9			nonoxynol-9
						norethisterone			norethisterone
						norgestimate			norgestimate
						norgestrel			norgestrel
						nortriptyline			nortriptyline
						nafcillin			nafcillin
						naftifine			naftifine
						naproxen			naproxen
						nefazodone			nefazodone
						nifedipine			nifedipine
						nimesulide			nimesulide
						levonorgestrel			levonorgestrel
						omeprazole			omeprazole
						orphenadrine			orphenadrine
						ouabain			ouabain
						oxaprozin			oxaprozin
						oxybenzone			oxybenzone
						oxymetazoline			oxymetazoline
						paclitaxel			paclitaxel
						pantoprazole			pantoprazole
						papaverine			papaverine
						parachlorophenol			parachlorophenol
						pargyline			pargyline
						paroxetine			paroxetine
						benzylpenicillin			benzylpenicillin
						pentoxifylline			pentoxifylline
						pergolide			pergolide
						perindopril			perindopril
						perphenazine			perphenazine
						phenazopyridine			phenazopyridine
						pheniramine			pheniramine
						phenolphthalein			phenolphthalein
						phenoxybenzamine			phenoxybenzamine
						phentermine			phentermine
						phentolamine			phentolamine
						phenylbutazone			phenylbutazone
						physostigmine			physostigmine
						pinacidil			pinacidil
						pindolol			pindolol
						pioglitazone			pioglitazone
						pipamperone			pipamperone
						pirenzepine			pirenzepine
						piroxicam			piroxicam
						pizotifen			pizotifen
						midostaurin			midostaurin
						pravastatin			pravastatin
						praziquantel			praziquantel
						prazosin			prazosin
						prednisolone			prednisolone
						prednisone			prednisone
						primaquine			primaquine
						primidone			primidone
						probenecid			probenecid
						probucol			probucol
						procainamide			procainamide
						prochlorperazine			prochlorperazine
						promazine			promazine
						propafenone			propafenone
						propofol			propofol
						protriptyline			protriptyline
						pseudoephedrine			pseudoephedrine
						mepyramine			mepyramine
						pyrimethamine			pyrimethamine
						parthenolide			parthenolide
						phenformin			phenformin
						pimozide			pimozide
						piretanide			piretanide
						pirfenidone			pirfenidone
						pivmecillinam			pivmecillinam
						practolol			practolol
						prednicarbate			prednicarbate
						pregnenolone			pregnenolone
						procarbazine			procarbazine
						procaterol			procaterol
						propoxycaine			propoxycaine
						dinoprostone			dinoprostone
						quetiapine			quetiapine
						quinidine			quinapril
						raloxifene			quinidine
						ranitidine			raloxifene
						ranolazine			ranitidine
						reserpine			ranolazine
						resorcinol			reserpine
						rizatriptan			resorcinol
						rofecoxib			rizatriptan
						ropinirole			rofecoxib
						rosiglitazone			ropinirole
						rosuvastatin			rosiglitazone
						reboxetine			rosuvastatin
						remoxipride			reboxetine
						rescinnamine			remoxipride
						resveratrol			rescinnamine
						riboflavin			resveratrol
						rilmenidine			tretinoin
						riluzole			riboflavin
						rimexolone			rilmenidine
						risperidone			riluzole
						lisuride			rimexolone
						scopolamine			risperidone
						sertraline			lisuride
						sildenafil			scopolamine
						sulconazole			sertraline
						sulpiride			sildenafil
						salmeterol			sulconazole
						saquinavir			sulpiride
						sertaconazole			salmeterol
						spironolactone			saquinavir
						tacrolimus			sertaconazole
						tadalafil			spironolactone
						telmisartan			tacrolimus
						teniposide			tadalafil
						tenoxicam			telmisartan
						terfenadine			tenoxicam
						testosterone			terfenadine
						thalidomide			testosterone
						thiotepa			thalidomide
						thiothixene			thiotepa
						ticlopidine			thiothixene
						tolazamide			ticlopidine
						tolbutamide			tolazamide
						tolmetin			tolbutamide
						toremifene			tolmetin
						tramadol			toremifene
						trazodone			tramadol
						triamterene			trazodone
						triclosan			triamterene
						triflupromazine			triclosan
						trimethobenzamide			triflupromazine
						trimipramine			trimethobenzamide
						trioxsalen			trimipramine
						tripelennamine			trioxsalen
						tubocurarine			tripelennamine
						talniflumate			tubocurarine
						terconazole			talniflumate
						thiocolchicoside			terconazole
						thioproperazine			thiocolchicoside
						timolol			thioproperazine
						atomoxetine			timolol
						tranilast			atomoxetine
						trapidil			tranilast
						brimonidine			trapidil
						valsartan			brimonidine
						vardenafil			valsartan
						venlafaxine			vardenafil
						verapamil			venlafaxine
						vinblastine			verapamil
						vincristine			vinblastine
						verteporfin			vincristine
						zolmitriptan			verteporfin
						zuclopenthixol			zolmitriptan
						flupentixol			zuclopenthixol
						formestane			flupentixol
						itraconazole			formestane
						imiquimod			fulvestrant
						rucaparib			sirolimus
						neratinib			teniposide
						sonidegib			epirubicin
						maraviroc			itraconazole
						ixazomib			imiquimod
						perhexiline			rucaparib
						vemurafenib			neratinib
						quinine			sonidegib
						temozolomide			maraviroc
						artesunate			perhexiline
						atorvastatin			vemurafenib
						temsirolimus			quinine
						mafenide			temozolomide
						azathioprine			artesunate
						azithromycin			atorvastatin
						carbidopa			temsirolimus
						cefotaxime			ixazomib
						clopidogrel			auranofin
						dicloxacillin			azathioprine
						ethambutol			mafenide
						gatifloxacin			azithromycin
						propranolol			carbidopa
						lamivudine			cefotaxime
						methylprednisolone			clopidogrel
						phenelzine			dicloxacillin
						ribavirin			ethambutol
						rifapentine			gatifloxacin
						terazosin			propranolol
						cyproheptadine			lamivudine
						cytarabine			methylprednisolone
						diphenhydramine			phenelzine
						selegiline			ribavirin
						nicorandil			rifapentine
						secnidazole			terazosin
						treprostinil			cyproheptadine
						zalcitabine			cytarabine
						didanosine			diphenhydramine
						niacin			selegiline
						cladribine			nicorandil
						iloprost			secnidazole
						deferiprone			treprostinil
						moclobemide			zalcitabine
						mesalazine			didanosine
						flucytosine			niacin
						fludarabine			cladribine
						desloratadine			iloprost
						decitabine			deferiprone
						doxercalciferol			moclobemide
						carbetocin			mesalazine
						dasatinib			flucytosine
						imatinib			fludarabine
						varenicline			desloratadine
						linezolid			decitabine
						alitretinoin			doxercalciferol
						sorafenib			carbetocin
						axitinib			dasatinib
						afatinib			imatinib
						lapatinib			varenicline
						lenalidomide			linezolid
						panobinostat			alitretinoin
						belinostat			sorafenib
						docetaxel			axitinib
						capecitabine			afatinib
						raltitrexed			lapatinib
						floxuridine			lenalidomide
						raltegravir			panobinostat
						sitagliptin			belinostat
						tofacitinib			docetaxel
						topotecan			capecitabine
						acarbose			raltitrexed
						alosetron			floxuridine
						alprazolam			raltegravir
						amlexanox			sitagliptin
						anastrozole			tofacitinib
						argatroban			topotecan
						aripiprazole			acarbose
						atracurium			alosetron
						azelastine			alprazolam
						benidipine			amlexanox
						bifonazole			anastrozole
						calcitriol			argatroban
						capsaicin			aripiprazole
						cefaclor			atracurium
						cefdinir			azelastine
						cefpodoxime			benidipine
						cephalexin			bifonazole
						cerivastatin			calcitriol
						chlordiazepoxide			capsaicin
						clarithromycin			cefaclor
						clofazimine			cefdinir
						clotrimazole			cefpodoxime
						dexbrompheniramine			cephalexin
						diphenoxylate			cerivastatin
						dofetilide			chlordiazepoxide
						dolasetron			clarithromycin
						doxapram			clofazimine
						efavirenz			clotrimazole
						enalaprilat			dexbrompheniramine
						esmolol			diphenoxylate
						esomeprazole			dofetilide
						famotidine			dolasetron
						flubendazole			doxapram
						tegafur			efavirenz
						goserelin			enalaprilat
						granisetron			esmolol
						idebenone			esomeprazole
						ifenprodil			famotidine
						indinavir			flubendazole
						pitavastatin			tegafur
						methotrexate			goserelin
						lacidipine			granisetron
						lansoprazole			idarubicin
						latanoprost			idebenone
						levetiracetam			ifenprodil
						levocetirizine			indinavir
						levofloxacin			pitavastatin
						lofexidine			methotrexate
						loratadine			lacidipine
						lorazepam			lansoprazole
						loteprednol			latanoprost
						loxoprofen			levetiracetam
						memantine			levocetirizine
						mepivacaine			levofloxacin
						meropenem			lofexidine
						metronidazole			loratadine
						midazolam			lorazepam
						miglitol			loteprednol
						milnacipran			loxoprofen
						montelukast			memantine
						moxifloxacin			mepivacaine
						nelfinavir			meropenem
						nicotinamide			metronidazole
						nisoldipine			midazolam
						nitazoxanide			miglitol
						nitrazepam			milnacipran
						olanzapine			montelukast
						olmesartan			moxifloxacin
						olopatadine			nelfinavir
						orlistat			nicotinamide
						oxiconazole			nisoldipine
						oxymetholone			nitazoxanide
						oxyphenonium			nitrazepam
						palonosetron			olanzapine
						pancuronium			olmesartan
						parecoxib			olopatadine
						pefloxacin			orlistat
						penciclovir			oxiconazole
						perospirone			oxymetholone
						polydatin			oxyphenonium
						pidotimod			palonosetron
						pilocarpine			pancuronium
						pramipexole			parecoxib
						rabeprazole			pefloxacin
						rifabutin			penciclovir
						rifaximin			perospirone
						ritonavir			polydatin
						rolitetracycline			pidotimod
						ropivacaine			pilocarpine
						salbutamol			pramipexole
						sibutramine			rabeprazole
						stavudine			rifabutin
						stiripentol			rifaximin
						sulfasalazine			ritonavir
						sumatriptan			rolitetracycline
						tegaserod			ropivacaine
						terbinafine			salbutamol
						disulfiram			sibutramine
						tiagabine			stavudine
						tinidazole			stiripentol
						tolterodine			sulfasalazine
						topiramate			sumatriptan
						oxcarbazepine			tegaserod
						trimebutine			terbinafine
						valaciclovir			disulfiram
						valdecoxib			tiagabine
						vecuronium			tinidazole
						vindesine			tolterodine
						vinorelbine			topiramate
						nevirapine			oxcarbazepine
						voriconazole			trimebutine
						xanthinol			valaciclovir
						zafirlukast			valdecoxib
						zileuton			vecuronium
						zolpidem			vindesine
						somatostatin			vinorelbine
						ruxolitinib			nevirapine
						dexketoprofen			voriconazole
						flupirtine			xanthinol
						isotretinoin			zafirlukast
						acitretin			zileuton
						rifampicin			zolpidem
						nilotinib			ketoconazole
						palbociclib			artemether
						crizotinib			balsalazide
						gefitinib			tibolone
						erlotinib			somatostatin
						lopinavir			ruxolitinib
						bosutinib			dexketoprofen
						pazopanib			flupirtine
						sunitinib			isotretinoin
						aprepitant			acitretin
						dexrazoxane			rifampicin
						entecavir			nilotinib
						cinacalcet			palbociclib
						safinamide			crizotinib
						iloperidone			gefitinib
						elvitegravir			erlotinib
						rivaroxaban			lopinavir
						teicoplanin			bosutinib
						tamibarotene			pazopanib
						ziprasidone			sunitinib
						dopamine			everolimus
									aprepitant
									dexrazoxane
									entecavir
									cinacalcet
									safinamide
									iloperidone
									elvitegravir
									rivaroxaban
									teicoplanin
									tamibarotene
									ziprasidone
									acepromazine
									dopamine
									acamprosate
									norepinephrine
									orciprenaline
									cyclophosphamide
									fosinopril
									bimatoprost
									gestrinone
									tolcapone
									edaravone
									bromfenac
									abiraterone
									eprosartan
									bosentan
									metformin
									entacapone
									alfacalcidol
									ataluren
									azacitidine
									kinetin
									acebutolol
									aceclofenac
									acemetacin
									acenocoumarol
									acetazolamide
									acetohexamide
									acipimox
									alizapride
									allantoin
									amifostine
									amikacin
									amoxicillin
									ampicillin
									antazoline
									asenapine
									astemizole
									atropine
									aztreonam
									baclofen
									bambuterol
									benfotiamine
									benzethonium
									benzocaine
									betazole
									bromperidol
									bufexamac
									bupivacaine
									busulfan
									butalbital
									butamben
									butenafine
									captopril
									pentoxyverine
									carbimazole
									carisoprodol
									cefadroxil
									cefazolin
									cefmetazole
									cefotetan
									ceftazidime
									cefuroxime
									celiprolol
									cefalotin
									chloramphenicol
									chlorcyclizine
									chlorhexidine
									chlormezanone
									chlorothiazide
									chlorzoxazone
									ciclopirox
									ciprofloxacin
									clenbuterol
									clindamycin
									cloperastine
									cloxacillin
									colchicine
									colistin
									cyanocobalamin
									cyclizine
									cyclobenzaprine
									dacarbazine
									dapsone
									demecarium
									demeclocycline
									dequalinium
									dexfenfluramine
									cinchocaine
									dicoumarol
									dimenhydrinate
									diosmin
									diphenylpyraline
									dyphylline
									metamizole
									dirithromycin
									doxofylline
									dyclonine
									edrophonium
									emedastine
									ethionamide
									ethosuximide
									etofenamate
									etoricoxib
									fenoprofen
									fenspiride
									fludrocortisone
									flumethasone
									fluocinonide
									flurandrenolide
									leucovorin
									fomepizole
									furosemide
									gentamicin
									gliclazide
									griseofulvin
									guanadrel
									guanethidine
									haloprogin
									hexetidine
									hydrochlorothiazide
									hydroflumethiazide
									hydroxychloroquine
									hydroxyzine
									ibutilide
									idoxuridine
									imipenem
									iohexol
									isosorbide
									josamycin
									kanamycin
									levodopa
									lincomycin
									lisinopril
									lomefloxacin
									lynestrenol
									mefloquine
									melatonin
									mepenzolate
									metaraminol
									methimazole
									methoxamine
									methyldopa
									miconazole
									minocycline
									moxisylyte
									neomycin
									neostigmine
									norfloxacin
									nystatin
									ofloxacin
									oxacillin
									oxandrolone
									oxytetracycline
									pentamidine
									pentolinium
									phenindione
									phenylpropanolamine
									piperacillin
									piracetam
									pramocaine
									pranlukast
									prilocaine
									procaine
									propylthiouracil
									pyrantel
									pyrazinamide
									pyridoxine
									apomorphine
									ribostamycin
									rimantadine
									sertindole
									spiramycin
									stanozolol
									sulfabenzamide
									sulfacetamide
									sulfadiazine
									sulfadimethoxine
									sulfamerazine
									sulfamethizole
									sulfamethoxazole
									sulfaphenazole
									sulfapyridine
									sulfathiazole
									sulindac
									tazobactam
									terbutaline
									tetracaine
									tetracycline
									thiamine
									tioguanine
									levothyroxine
									tiapride
									tioconazole
									tizanidine
									tolnaftate
									triflusal
									trihexyphenidyl
									trimetazidine
									trimethadione
									trimethoprim
									troleandomycin
									vancomycin
									vidarabine
									vigabatrin
									xylometazoline
									zaleplon
									zidovudine
									zopiclone
									cefoxitin
									benzatropine
									phenytoin
									doxazosin
									doxycycline
									ganciclovir
									procyclidine
									mercaptopurine
									methazolamide
									acetylcholine
									mupirocin
									oxybutynin
									phylloquinone
									propantheline
									spectinomycin
									theophylline
									bethanechol
									trichloroethylene
									levobunolol
									isoprenaline
									atenolol
									cycloserine
									fluorouracil
									acetylcysteine
									allopurinol
									ambrisentan
									aminophylline
									arbutin
									azlocillin
									bacitracin
									benserazide
									bretylium
									carbachol
									cefepime
									chloropyramine
									clocortolone
									darifenacin
									deflazacort
									diacerein
									dorzolamide
									enoxacin
									gabapentin
									gemcitabine
									guaiacol
									halofantrine
									ifosfamide
									iodixanol
									iopamidol
									iopromide
									ioversol
									isometheptene
									lymecycline
									mecamylamine
									methenamine
									misoprostol
									monobenzone
									latamoxef
									nomegestrol
									novobiocin
									oxyphenbutazone
									paromomycin
									penbutolol
									pivampicillin
									pralidoxime
									pyrvinium
									rivastigmine
									roxithromycin
									sparfloxacin
									sulbactam
									sulfadoxine
									suprofen
									theobromine
									thonzonium
									ticarcillin
									trichlormethiazide
									trifluridine
									tyloxapol
									viloxazine
									viomycin
									olaparib
									idelalisib
									cantharidin
									enzalutamide
									trametinib
									ibrutinib
									ponatinib
									nintedanib
									adapalene
									cerulenin
									curcumin
									glucosamine
									hexachlorophene
									rimonabant
									suramin
									cisplatin
									bortezomib
									tigecycline
									dabrafenib

## Sheet: B_antihypertensives_DE
Table 1B. Differential expression result for ACE2 gene in cells treated by anti-hypentensive drugs vs control
drug	gene	logFC	average expression	t value	p value	adjusted p value	B
methyldopa	ACE2	-0.604544	3.50001	-4.31494	0.00246033	0.112213	-1.91305
molsidomine	ACE2	-0.29017	3.67102	-3.2335	0.00467556	0.112213	-2.5
telmisartan	ACE2	-0.268851	3.96098	-2.63282	0.0146014	0.233623	-2.95445
fenoldopam	ACE2	-0.369403	3.87095	-2.4484	0.0250316	0.300379	-3.28332
bosentan	ACE2	-0.329143	3.97954	-1.86471	0.0788756	0.66019	-4.0551
guanethidine	ACE2	-0.385056	3.60975	-1.93842	0.0869404	0.66019	-4.15053
guanadrel	ACE2	-0.273342	3.73825	-1.88649	0.0962778	0.66019	-4.39202
pindolol	ACE2	-0.185177	3.90939	-1.60997	0.126448	0.738191	-4.32927
acebutolol	ACE2	0.196823	4.18147	1.47183	0.15757	0.738191	-4.43188
spironolactone	ACE2	0.171191	4.08156	1.40508	0.170474	0.738191	-4.45594
fosinopril	ACE2	0.492665	4.49787	1.36744	0.196403	0.738191	-4.48863
perindopril	ACE2	-0.173109	4.02025	-1.3369	0.197252	0.738191	-4.51304
benazepril	ACE2	0.389427	4.3249	1.2742	0.215238	0.738191	-4.53804
verapamil	ACE2	-0.102053	4.09439	-1.16927	0.248931	0.738191	-5.04753
nicardipine	ACE2	-0.0731034	4.12422	-1.07131	0.287945	0.738191	-5.29297
felodipine	ACE2	-0.130158	3.85579	-1.05879	0.303275	0.738191	-4.68623
valsartan	ACE2	0.141151	4.25682	1.04468	0.305008	0.738191	-4.68017
hydroflumethiazide	ACE2	0.408741	4.35816	1.04193	0.311842	0.738191	-4.61048
moxonidine	ACE2	0.102745	4.14678	1.01877	0.318727	0.738191	-4.68535
mecamylamine	ACE2	-0.171804	3.90609	-1.04957	0.32332	0.738191	-4.61785
ramipril	ACE2	-0.0703243	4.13648	-0.997806	0.32489	0.738191	-4.92321
metoprolol	ACE2	0.114777	3.87349	0.944468	0.357757	0.738191	-4.68731
losartan	ACE2	-0.0845796	4.0613	-0.920988	0.365914	0.738191	-4.83142
amlodipine	ACE2	0.19467	4.2723	0.868862	0.393426	0.738191	-5.24149
amiloride	ACE2	0.135888	4.16139	0.818645	0.41843	0.738191	-4.97001
prazosin	ACE2	0.0805273	4.14385	0.816156	0.422278	0.738191	-4.7995
clonidine	ACE2	0.102363	4.29631	0.799004	0.429775	0.738191	-5.2735
quinapril	ACE2	0.217383	4.27331	0.817863	0.430612	0.738191	-4.64692
doxazosin	ACE2	0.131328	4.21987	0.696017	0.495117	0.757226	-4.82777
torasemide	ACE2	0.14073	4.21992	0.681436	0.501304	0.757226	-4.87479
indapamide	ACE2	0.0629944	4.13144	0.676673	0.501752	0.757226	-5.07658
furosemide	ACE2	0.180265	3.89241	0.696864	0.504817	0.757226	-4.64539
irbesartan	ACE2	0.0815148	4.32824	0.620735	0.542322	0.763932	-5.69593
metolazone	ACE2	0.126215	4.0268	0.599329	0.556725	0.763932	-4.77608
enalapril	ACE2	0.040813	4.04979	0.593753	0.557034	0.763932	-5.05053
bisoprolol	ACE2	0.135737	4.35535	0.556827	0.584327	0.770591	-5.35993
lisinopril	ACE2	0.0800896	3.84232	0.531694	0.60894	0.770591	-4.7048
sildenafil	ACE2	0.0795744	4.31724	0.511804	0.613529	0.770591	-4.85922
isradipine	ACE2	0.0989166	4.18781	0.492956	0.626105	0.770591	-4.88115
minoxidil	ACE2	-0.0353956	4.12364	-0.448692	0.655825	0.78699	-5.79848
chlorthalidone	ACE2	-0.0514412	4.10407	-0.379945	0.707134	0.801645	-4.92595
nitrendipine	ACE2	0.0630728	4.26398	0.3687	0.714377	0.801645	-4.93799
aliskiren	ACE2	0.0503087	4.20085	0.369324	0.71814	0.801645	-5.13007
phentolamine	ACE2	-0.0215726	4.0205	-0.231035	0.818925	0.893372	-5.0702
ambrisentan	ACE2	0.0334874	4.00874	0.179089	0.861954	0.919417	-4.77274
labetalol	ACE2	0.0117438	4.16146	0.0846196	0.932914	0.958267	-5.6392
reserpine	ACE2	-0.00890788	3.96031	-0.0784817	0.938304	0.958267	-5.9439
lacidipine	ACE2	0.00981663	4.17926	0.0532666	0.95827	0.95827	-5.96434

## Sheet: C_antihypertensives_GSEA
Table 1B. Result of enrichment of ACE2-modulating genes in different drug classes using the GSEA method for anti-hypentensive drugs
drug class	p value	adjusted p value	enrichment score	normalized enrichment score	number of more extreme cases	number of drugs	key drugs (leadingEdge)
ACEIs	0.0259409	0.0966628	0.726714	1.62	121	7	fosinopril, benazepril, quinapril
other anti-adrenergics	0.0322209	0.0966628	-0.786548	-1.56322	167	5	guanethidine, guanadrel, mecamylamine
diuretics	0.0582607	0.116521	0.677045	1.50928	273	7	hydroflumethiazide, furosemide, torasemide, amiloride, metolazone
beta-blockers	0.738908	0.958537	0.434509	0.805886	3613	4	acebutolol, bisoprolol, metoprolol
ARBs	0.860226	0.958537	-0.363492	-0.676493	4424	4	telmisartan, losartan
CCBs	0.958537	0.958537	0.243902	0.54371	4507	7	amlodipine, isradipine, nitrendipine, lacidipine, nicardipine, verapamil, felodipine

## Sheet: D_antidiabetics_DE
Table 1D. Differential expression result for ACE2 gene in cells treated by anti-diabetic drugs vs control
drug	gene	logFC	average expression	t value	p value	adjusted p value	B
gliquidone	ACE2	-0.215234	3.86818	-1.85126	0.0766514	0.324115	-4.05388
tolazamide	ACE2	0.209589	4.21548	1.69773	0.0931066	0.324115	-4.53586
glipizide	ACE2	-0.139622	3.86276	-1.66419	0.104138	0.324115	-4.40083
tolbutamide	ACE2	0.2185	4.04182	1.63774	0.109599	0.324115	-4.37422
glimepiride	ACE2	0.176746	4.06704	1.55987	0.124905	0.324115	-4.35192
acarbose	ACE2	-0.138805	3.88717	-1.46367	0.149592	0.324115	-4.69057
nateglinide	ACE2	0.203206	4.14004	1.31621	0.197924	0.367572	-4.51782
phenformin	ACE2	0.157393	4.04997	1.22838	0.228425	0.371191	-4.80076
repaglinide	ACE2	0.0953736	4.2082	0.991611	0.327221	0.428423	-5.27626
rosiglitazone	ACE2	0.0749089	4.02839	0.982413	0.329556	0.428423	-5.54423
pioglitazone	ACE2	0.170502	4.06877	0.854481	0.397782	0.470105	-5.4687
sitagliptin	ACE2	0.0776324	4.11743	0.688848	0.498972	0.540553	-5.51126
miglitol	ACE2	-0.0229639	3.9595	-0.16339	0.871803	0.871803	-5.18663

## Sheet: E_antidiabetics_GSEA
Table 1E. Result of enrichment of ACE2-modulating genes in different drug classes using the GSEA method for anti-diabetic drugs
drug class	p value	adjusted p value	enrichment score	normalized enrichment score	number of more extreme cases	number of drugs	key drugs (leadingEdge)
alpha-glucosidase inhibitors	0.173094	0.86547	-0.818182	-1.38584	780	2	acarbose, miglitol
sulfonylureas	0.410618	1	0.505239	1.05036	2505	5	tolbutamide, tolazamide, glimepiride
non-sulfonylurea secretagogues	0.643526	1	0.5	0.914518	3846	3	nateglinide, repaglinide, sitagliptin
biguanides	0.853513	1	0.583333	0.860151	4567	1	phenformin
thiazolidinediones	1	1	0	0	4511	2

## Sheet: F_all_approved_drugs_DE
Table 1F. Differential expression result for ACE2 gene in cells treated by all clinically approved drugs vs control
drug	gene	logFC	average expression	t value	p value	adjusted p value	B
vorinostat	ACE2	0.321435	4.43403	9.72619	4.12874e-21	2.77451e-18	36.0775
panobinostat	ACE2	0.456664	4.50536	4.53585	2.29032e-05	0.00769548	1.72581
isotretinoin	ACE2	-0.477757	3.76451	-4.25079	0.000158743	0.0355584	0.900057
midostaurin	ACE2	-0.40905	3.83537	-3.72496	0.00149266	0.208881	-1.17766
afatinib	ACE2	0.455755	4.32634	3.62173	0.00163457	0.208881	-1.38429
parthenolide	ACE2	0.256429	4.29554	3.20487	0.00209908	0.208881	-1.69059
tamoxifen	ACE2	0.206862	4.40244	3.11874	0.00217584	0.208881	-1.83864
ribavirin	ACE2	0.312058	4.16697	3.24674	0.00374259	0.29812	-1.794
methantheline	ACE2	0.309634	4.137	3.14988	0.00436667	0.29812	-2.41385
atorvastatin	ACE2	0.409892	4.36935	2.93138	0.00526753	0.29812	-2.39561
gefitinib	ACE2	-0.306987	3.91752	-2.88555	0.00540331	0.29812	-2.27593
lamotrigine	ACE2	0.316966	4.13836	2.99234	0.00555879	0.29812	-3.26246
famciclovir	ACE2	0.354237	4.21002	2.90343	0.00596109	0.29812	-2.95009
topotecan	ACE2	-0.621225	3.93165	-3.04869	0.00642781	0.29812	-2.86884
dexamethasone	ACE2	0.17566	4.19574	2.74765	0.00665447	0.29812	-2.65982
thiothixene	ACE2	0.308834	4.16104	2.89039	0.00726367	0.305074	-2.68417
ropinirole	ACE2	0.506932	4.18975	2.8536	0.00831618	0.328734	-3.59136
ixazomib	ACE2	0.477505	4.70394	2.83809	0.00897116	0.334923	-3.50676
rifampicin	ACE2	0.239635	4.08981	2.65629	0.00978478	0.346072	-2.75134
dexrazoxane	ACE2	-0.37057	3.87846	-2.82311	0.0109392	0.367556	-3.00119
clomifene	ACE2	0.293283	4.31834	2.57459	0.0122655	0.37181	-3.13557
ifenprodil	ACE2	0.514802	4.24962	2.71855	0.012372	0.37181	-3.15503
quetiapine	ACE2	0.27639	4.15467	2.62281	0.0127257	0.37181	-2.93454
benzonatate	ACE2	0.485783	4.2248	2.63531	0.0138771	0.388559	-3.72704
molsidomine	ACE2	-0.255133	3.71249	-2.62944	0.0150596	0.395883	-3.24459
tropisetron	ACE2	0.222958	4.20463	2.50175	0.0153169	0.395883	-3.09972
stiripentol	ACE2	0.593558	4.19331	2.59957	0.0179993	0.447984	-3.67357
parecoxib	ACE2	0.461671	4.30446	2.53757	0.0219294	0.525154	-3.28161
tretinoin	ACE2	-0.165432	4.24262	-2.3057	0.0234821	0.525154	-3.76601
estriol	ACE2	0.208776	4.4221	2.28566	0.0246519	0.525154	-3.39365
diltiazem	ACE2	0.173064	4.01177	2.26687	0.02543	0.525154	-3.39375
simvastatin	ACE2	0.2774	4.3337	2.28159	0.0256681	0.525154	-3.77089
molindone	ACE2	0.365399	4.28921	2.28463	0.0275044	0.525154	-3.57077
dofetilide	ACE2	0.234318	4.19078	2.40563	0.0284255	0.525154	-3.37389
azelastine	ACE2	-0.22675	3.90064	-2.33954	0.0285391	0.525154	-3.39981
lansoprazole	ACE2	0.423164	4.26072	2.33967	0.0287209	0.525154	-3.63819
cilostazol	ACE2	0.764859	4.33293	2.3068	0.0289147	0.525154	-3.52393
voriconazole	ACE2	0.227381	4.1498	2.2546	0.0298957	0.528682	-3.68138
thioridazine	ACE2	0.0983247	4.02363	2.17049	0.0312507	0.531165	-4.46218
amantadine	ACE2	-0.243051	3.83673	-2.29354	0.031617	0.531165	-3.72971
itraconazole	ACE2	0.303607	4.35139	2.16563	0.0357337	0.575255	-3.67367
ezetimibe	ACE2	0.551922	4.29244	2.16488	0.0371955	0.575255	-3.62737
droperidol	ACE2	0.195216	4.15332	2.1473	0.0388107	0.575255	-3.71367
crizotinib	ACE2	-0.400309	4.22354	-2.15231	0.040249	0.575255	-4.4499
pidotimod	ACE2	-0.311936	3.91766	-2.21083	0.0413115	0.575255	-3.862
ticlopidine	ACE2	-0.225619	3.85437	-2.12107	0.0416778	0.575255	-3.77121
fluvastatin	ACE2	0.259333	4.10826	2.13173	0.0421118	0.575255	-4.25268
sirolimus	ACE2	0.120935	4.09538	2.04092	0.0423914	0.575255	-5.0694
mestranol	ACE2	0.23774	4.04807	2.05903	0.0435843	0.575255	-3.77395
dipyridamole	ACE2	0.26779	4.12764	2.07208	0.0443399	0.575255	-3.77455
norethisterone	ACE2	0.121291	3.94982	2.02196	0.0464487	0.575255	-4.25493
eplerenone	ACE2	0.263188	4.12664	2.15446	0.0464744	0.575255	-3.72994
protriptyline	ACE2	0.301947	4.12957	2.08508	0.0465068	0.575255	-3.7768
benzthiazide	ACE2	-0.17418	3.89151	-2.08184	0.0466907	0.575255	-3.79311
pimozide	ACE2	0.400669	4.30205	2.04217	0.0470819	0.575255	-4.28161
flutamide	ACE2	0.247346	4.10733	2.06505	0.0480089	0.576107	-3.84438
ethotoin	ACE2	0.372924	4.3684	2.03763	0.0516424	0.590984	-3.95485
orlistat	ACE2	0.242607	4.19493	2.08709	0.0526902	0.590984	-4.44983
chlorphenamine	ACE2	0.203483	4.10762	1.96657	0.0532897	0.590984	-3.8736
moclobemide	ACE2	-0.279231	3.85261	-2.03872	0.0532987	0.590984	-4.06364
neratinib	ACE2	0.379435	4.60488	2.01652	0.0541589	0.590984	-4.40054
salmeterol	ACE2	-0.144723	3.92416	-1.97431	0.055892	0.590984	-4.23405
benazepril	ACE2	0.365002	4.15667	1.96918	0.0559679	0.590984	-3.88462
teniposide	ACE2	-0.269088	4.06451	-1.99316	0.0570167	0.590984	-4.98167
cefpodoxime	ACE2	0.483907	4.31558	2.049	0.0571637	0.590984	-4.11881
imatinib	ACE2	0.136276	4.14542	1.93796	0.0595704	0.606535	-4.29502
niclosamide	ACE2	-0.167974	4.20379	-1.89683	0.0633508	0.610882	-5.50452
phenoxybenzamine	ACE2	0.257429	4.06141	1.8753	0.0655841	0.610882	-4.35042
pramipexole	ACE2	-0.194321	3.95276	-1.86625	0.0680378	0.610882	-4.00986
clozapine	ACE2	-0.169406	3.90638	-1.87364	0.0697212	0.610882	-4.03873
ouabain	ACE2	-0.244586	4.15137	-1.8732	0.069776	0.610882	-5.34296
tripelennamine	ACE2	-0.157355	3.89344	-1.86279	0.072076	0.610882	-4.04254
triprolidine	ACE2	-0.148311	4.17402	-1.81818	0.0745052	0.610882	-4.23008
fluphenazine	ACE2	0.143431	4.3552	1.79841	0.0746081	0.610882	-4.59993
fenbufen	ACE2	0.451947	4.20788	1.85022	0.0755759	0.610882	-4.19537
fenoldopam	ACE2	-0.207875	3.84543	-1.8389	0.0756901	0.610882	-4.08422
bifonazole	ACE2	-0.205636	3.97081	-1.88921	0.0764102	0.610882	-4.11973
desipramine	ACE2	0.264131	4.14659	1.81659	0.0765092	0.610882	-4.09854
gliquidone	ACE2	-0.215234	3.86818	-1.85126	0.0766514	0.610882	-4.05388
etomidate	ACE2	0.312485	4.09054	1.81482	0.0780432	0.610882	-4.103
tacrolimus	ACE2	0.297845	4.18652	1.78655	0.0797573	0.610882	-4.31832
tolmetin	ACE2	-0.179978	3.88861	-1.81606	0.0801968	0.610882	-4.0888
ropivacaine	ACE2	-0.16422	3.81442	-1.8542	0.0803148	0.610882	-4.25008
formestane	ACE2	0.148405	4.01157	1.82126	0.0824908	0.610882	-4.13692
chlorpromazine	ACE2	0.210506	4.11912	1.75827	0.0826427	0.610882	-4.59372
telmisartan	ACE2	-0.175544	3.96799	-1.77952	0.0833906	0.610882	-4.26046
flucloxacillin	ACE2	0.235992	4.10018	1.80509	0.0837132	0.610882	-4.22989
phentermine	ACE2	0.702131	4.32543	1.80927	0.0846853	0.610882	-4.28683
midodrine	ACE2	0.144198	4.01471	1.74807	0.0847906	0.610882	-4.42461
pinacidil	ACE2	0.269321	4.02981	1.7474	0.0857162	0.610882	-4.19025
cyclopentolate	ACE2	0.151427	4.14783	1.7804	0.0859104	0.610882	-4.2024
idebenone	ACE2	-0.14433	3.94185	-1.79126	0.0866038	0.610882	-4.24579
guaifenesin	ACE2	0.188537	4.2762	1.76958	0.0881543	0.610882	-4.45646
toremifene	ACE2	0.177021	4.44882	1.72521	0.0889221	0.610882	-4.74399
chlorprothixene	ACE2	0.274428	4.11912	1.765	0.0889811	0.610882	-4.68196
duloxetine	ACE2	-0.138597	3.89187	-1.73019	0.0897033	0.610882	-4.45213
safinamide	ACE2	0.268285	4.2053	1.79531	0.0899356	0.610882	-4.37893
pravastatin	ACE2	0.116585	4.11109	1.70831	0.0920919	0.610882	-4.35145
amcinonide	ACE2	0.123163	4.04947	1.72165	0.092531	0.610882	-4.47101
tolazamide	ACE2	0.209589	4.21548	1.69773	0.0931066	0.610882	-4.53586
ibudilast	ACE2	-0.150487	3.86118	-1.73132	0.0937186	0.610882	-4.26883
rifapentine	ACE2	0.219953	4.12622	1.71924	0.0942539	0.610882	-4.21343
oxaprozin	ACE2	0.139487	4.08245	1.7112	0.0944835	0.610882	-4.1915
amlodipine	ACE2	0.231928	4.11066	1.70764	0.0951552	0.610882	-4.83787
etodolac	ACE2	0.232116	4.13681	1.69656	0.0954503	0.610882	-4.29466
fenoterol	ACE2	0.23487	4.09934	1.71726	0.0974899	0.613841	-4.32374
nabumetone	ACE2	0.527707	4.47506	1.71533	0.0981098	0.613841	-4.42993
artesunate	ACE2	0.233923	4.45824	1.68349	0.0992598	0.613841	-5.57454
hydralazine	ACE2	-0.176859	3.89791	-1.7128	0.100524	0.613841	-4.25659
riboflavin	ACE2	0.374522	4.24676	1.72123	0.101231	0.613841	-4.30464
methysergide	ACE2	-0.15437	3.86917	-1.67389	0.101424	0.613841	-4.53641
budesonide	ACE2	-0.13561	4.02578	-1.65025	0.102307	0.613841	-4.68995
glipizide	ACE2	-0.139622	3.86276	-1.66419	0.104138	0.61891	-4.40083
carbidopa	ACE2	-0.194679	4.03513	-1.68089	0.105467	0.61891	-4.51649
pregnenolone	ACE2	-0.13783	3.87056	-1.65511	0.105942	0.61891	-4.4721
capecitabine	ACE2	0.395109	4.27617	1.69117	0.106856	0.61891	-4.25041
pazopanib	ACE2	-0.228048	4.07584	-1.68209	0.108289	0.61891	-4.51458
lovastatin	ACE2	0.295073	4.1234	1.64238	0.109153	0.61891	-4.97139
tolbutamide	ACE2	0.2185	4.04182	1.63774	0.109599	0.61891	-4.37422
naproxen	ACE2	-0.115448	3.83068	-1.6165	0.112177	0.619236	-4.49718
meclocycline	ACE2	-0.176714	3.82105	-1.63627	0.112288	0.619236	-4.36068
domperidone	ACE2	0.317443	4.13309	1.64891	0.113663	0.619236	-4.29308
praziquantel	ACE2	-0.175268	3.84543	-1.63195	0.113968	0.619236	-4.42362
rucaparib	ACE2	0.418876	4.59461	1.63422	0.115141	0.619236	-4.28984
dihydroergotamine	ACE2	-0.103252	4.08283	-1.60262	0.115891	0.619236	-4.49568
perphenazine	ACE2	0.274823	4.0727	1.60394	0.116107	0.619236	-4.93738
anagrelide	ACE2	-0.160285	3.93633	-1.60205	0.118	0.624378	-4.29951
danazol	ACE2	0.126871	4.02126	1.5577	0.122988	0.638606	-5.0351
tramadol	ACE2	0.143838	4.00799	1.58119	0.12321	0.638606	-4.32845
meloxicam	ACE2	0.140832	4.06319	1.57838	0.12354	0.638606	-4.71709
glimepiride	ACE2	0.176746	4.06704	1.55987	0.124905	0.639753	-4.35192
trifluoperazine	ACE2	0.220393	4.49834	1.54158	0.125666	0.639753	-5.08709
pirlindole	ACE2	0.223645	4.32303	1.5616	0.130269	0.655469	-4.34218
sonidegib	ACE2	-0.155249	4.30754	-1.56255	0.130807	0.655469	-4.88638
thalidomide	ACE2	0.20984	4.1802	1.52747	0.131679	0.655469	-4.64155
cladribine	ACE2	0.130268	3.99436	1.52766	0.134599	0.661089	-5.39452
metyrapone	ACE2	-0.141809	4.1403	-1.54082	0.134995	0.661089	-4.46485
gemfibrozil	ACE2	0.110941	4.09437	1.50871	0.135759	0.661089	-4.68791
bupropion	ACE2	-0.138133	3.93826	-1.50368	0.137187	0.663233	-4.61674
primidone	ACE2	0.128108	4.0278	1.50199	0.140449	0.666734	-4.40021
fludarabine	ACE2	-0.11893	3.9521	-1.48702	0.140904	0.666734	-5.39073
prednisolone	ACE2	-0.129055	3.8598	-1.49516	0.143052	0.666734	-4.39026
azathioprine	ACE2	0.289773	4.21521	1.48613	0.144572	0.666734	-4.88593
timolol	ACE2	0.349166	4.11465	1.48884	0.14507	0.666734	-4.39483
sulconazole	ACE2	0.307431	4.1359	1.50728	0.145092	0.666734	-4.93088
perospirone	ACE2	0.231518	4.18938	1.52097	0.147249	0.666734	-4.39069
ceforanide	ACE2	0.136309	4.03132	1.50267	0.147354	0.666734	-4.3914
acarbose	ACE2	-0.138805	3.88717	-1.46367	0.149592	0.666734	-4.69057
varenicline	ACE2	0.292752	4.14573	1.49973	0.152261	0.666734	-4.48635
valaciclovir	ACE2	0.4845	4.25626	1.4788	0.153246	0.666734	-4.51336
pefloxacin	ACE2	0.38663	4.24778	1.48053	0.153442	0.666734	-4.41633
desoximetasone	ACE2	0.379298	4.12843	1.45629	0.153624	0.666734	-4.63352
alprenolol	ACE2	0.202153	4.10783	1.46293	0.155592	0.666734	-4.46596
cefixime	ACE2	0.128941	4.02788	1.43527	0.160428	0.666734	-4.50199
flucytosine	ACE2	0.192659	4.14547	1.43776	0.164159	0.666734	-4.56449
cisapride	ACE2	0.121423	4.12164	1.4092	0.164227	0.666734	-4.51965
chloroxine	ACE2	0.19211	4.07796	1.42651	0.165281	0.666734	-5.10113
doxapram	ACE2	0.247133	4.02009	1.44214	0.166155	0.666734	-4.46095
ritonavir	ACE2	-0.152082	3.92795	-1.41109	0.167931	0.666734	-4.49655
spironolactone	ACE2	0.129685	3.94472	1.39752	0.169327	0.666734	-4.81292
letrozole	ACE2	0.165413	4.24322	1.39785	0.169722	0.666734	-4.4811
aliskiren	ACE2	0.146065	4.0474	1.41922	0.17031	0.666734	-4.52571
estradiol	ACE2	0.0859048	4.58197	1.37646	0.170459	0.666734	-5.14079
trimebutine	ACE2	0.511314	4.32928	1.42944	0.172079	0.666734	-4.45372
clofazimine	ACE2	-0.182835	3.82221	-1.41048	0.172617	0.666734	-4.65708
lapatinib	ACE2	0.238439	4.17249	1.3903	0.173051	0.666734	-5.15219
chlortetracycline	ACE2	0.118609	4.22308	1.39217	0.1753	0.666734	-4.53295
sertaconazole	ACE2	-0.170887	3.85098	-1.38775	0.175492	0.666734	-4.95021
promazine	ACE2	0.246094	4.256	1.37486	0.175624	0.666734	-4.98363
palonosetron	ACE2	0.207486	4.00027	1.40648	0.175929	0.666734	-4.65527
cetirizine	ACE2	-0.132792	3.90947	-1.37926	0.176208	0.666734	-4.51421
palbociclib	ACE2	-0.155603	4.05831	-1.39888	0.176644	0.666734	-5.43243
tamibarotene	ACE2	0.174691	4.32668	1.39648	0.17683	0.666734	-4.92449
nafcillin	ACE2	0.137631	3.99703	1.36137	0.178708	0.666734	-4.93699
parachlorophenol	ACE2	0.200804	3.92552	1.40405	0.178796	0.666734	-4.66971
reboxetine	ACE2	0.182687	3.99103	1.37728	0.179073	0.666734	-4.50742
pindolol	ACE2	-0.115989	3.84564	-1.37872	0.179894	0.666734	-4.70306
milnacipran	ACE2	0.179046	4.16315	1.4012	0.180031	0.666734	-4.46557
diflunisal	ACE2	0.261785	4.06183	1.36188	0.181147	0.666734	-4.68164
menadione	ACE2	0.220987	4.35114	1.35667	0.181553	0.666734	-5.30014
metaxalone	ACE2	-0.186517	3.885	-1.38935	0.181869	0.666734	-4.61646
dexbrompheniramine	ACE2	0.43122	4.28923	1.39509	0.181953	0.666734	-4.48622
doxepin	ACE2	0.0813447	4.0441	1.34323	0.182049	0.666734	-4.88235
diphenoxylate	ACE2	-0.208839	3.96921	-1.3847	0.184462	0.666734	-4.96013
fluvoxamine	ACE2	0.184365	4.14794	1.35026	0.185207	0.666734	-4.50804
nilotinib	ACE2	-0.180926	4.37583	-1.35193	0.185732	0.666734	-5.52938
loxapine	ACE2	0.195216	4.11331	1.34485	0.186171	0.666734	-4.67435
oxyphenonium	ACE2	0.306517	4.0432	1.37574	0.186527	0.666734	-4.49569
cefotiam	ACE2	0.153073	3.97622	1.34762	0.188372	0.667828	-4.49354
pseudoephedrine	ACE2	-0.159387	3.778	-1.35315	0.189387	0.667828	-4.52359
physostigmine	ACE2	-0.145524	3.88475	-1.33328	0.191368	0.667828	-4.62343
crotamiton	ACE2	0.253113	4.14532	1.33034	0.191489	0.667828	-4.50751
methocarbamol	ACE2	0.149853	3.89319	1.34497	0.191802	0.667828	-4.51333
mifepristone	ACE2	0.143178	4.01172	1.3121	0.19468	0.667869	-5.36312
tropicamide	ACE2	0.12493	4.10137	1.30878	0.194785	0.667869	-5.03515
loperamide	ACE2	0.0990921	4.13812	1.31289	0.194795	0.667869	-5.07969
norgestimate	ACE2	0.146542	4.06952	1.32394	0.196802	0.668365	-4.81729
tranylcypromine	ACE2	0.264997	4.29627	1.32124	0.197883	0.668365	-4.9341
nateglinide	ACE2	0.203206	4.14004	1.31621	0.197924	0.668365	-4.51782
biperiden	ACE2	0.10175	4.02961	1.29606	0.201779	0.670428	-4.58705
prednisone	ACE2	0.163608	4.01487	1.30645	0.202457	0.670428	-4.51355
sumatriptan	ACE2	0.144639	4.08633	1.31273	0.202499	0.670428	-4.52755
tofacitinib	ACE2	-0.1953	3.98096	-1.31675	0.202902	0.670428	-4.99214
amlexanox	ACE2	0.203379	4.17531	1.32591	0.203523	0.670428	-4.9678
quinine	ACE2	0.187622	4.47898	1.299	0.206085	0.675556	-4.87088
probenecid	ACE2	0.126747	3.97939	1.26161	0.211487	0.68296	-4.59031
oxybenzone	ACE2	-0.165234	3.79256	-1.28367	0.212396	0.68296	-4.5278
maraviroc	ACE2	0.339149	4.55474	1.27985	0.212748	0.68296	-4.83153
cilastatin	ACE2	0.339062	4.11883	1.26408	0.214211	0.68296	-4.55106
irbesartan	ACE2	0.105287	4.06912	1.26364	0.214553	0.68296	-5.25235
nalbuphine	ACE2	0.0977622	4.09721	1.25394	0.215191	0.68296	-4.73894
cilnidipine	ACE2	0.140554	4.0067	1.26539	0.215458	0.68296	-5.26533
fenofibrate	ACE2	0.145682	3.89111	1.26108	0.220107	0.685246	-4.56578
carbinoxamine	ACE2	0.259375	4.08845	1.24628	0.220638	0.685246	-4.64827
amsacrine	ACE2	0.647666	4.38487	1.26628	0.221553	0.685246	-5.53326
metoclopramide	ACE2	-0.112183	3.76217	-1.25304	0.222877	0.685246	-4.61236
propafenone	ACE2	0.0822064	3.98412	1.22855	0.223434	0.685246	-5.42756
clopidogrel	ACE2	0.263161	4.24736	1.27601	0.223469	0.685246	-4.93927
pirfenidone	ACE2	0.180397	3.9479	1.24893	0.224347	0.685246	-4.74286
prochlorperazine	ACE2	-0.111925	3.96051	-1.2336	0.225423	0.685246	-5.2551
risperidone	ACE2	0.152664	4.06078	1.22823	0.225924	0.685246	-4.63345
belinostat	ACE2	0.348639	4.41366	1.25137	0.226376	0.685246	-5.97597
capsaicin	ACE2	0.189275	4.16826	1.25387	0.227629	0.685275	-4.54122
phenformin	ACE2	0.157393	4.04997	1.22838	0.228425	0.685275	-4.80076
cytarabine	ACE2	0.242216	4.15542	1.23144	0.231569	0.69162	-5.50453
probucol	ACE2	-0.119091	3.75872	-1.22632	0.232682	0.691868	-4.56438
remoxipride	ACE2	0.269031	4.11203	1.21442	0.237228	0.699228	-4.55843
benzydamine	ACE2	0.167595	3.97644	1.20589	0.237365	0.699228	-4.62368
tenoxicam	ACE2	0.474276	4.27892	1.21445	0.238771	0.699228	-4.55656
doconexent	ACE2	-0.180139	3.73505	-1.22093	0.239319	0.699228	-4.58207
moexipril	ACE2	0.111714	3.97561	1.2038	0.240822	0.699886	-4.57173
alosetron	ACE2	0.260275	4.26747	1.21959	0.241627	0.699886	-4.55362
vincristine	ACE2	0.169153	4.13545	1.16922	0.248146	0.715682	-5.93714
olanzapine	ACE2	-0.125209	3.98653	-1.16909	0.254466	0.728481	-4.64297
montelukast	ACE2	0.114129	4.01647	1.15564	0.255527	0.728481	-4.92922
ambroxol	ACE2	0.222755	4.05194	1.1611	0.256067	0.728481	-4.60844
ranolazine	ACE2	0.100545	4.0611	1.14985	0.257718	0.728481	-4.68486
citalopram	ACE2	0.0971544	4.15942	1.14324	0.258004	0.728481	-5.13225
isradipine	ACE2	0.172753	4.23992	1.13945	0.261327	0.734693	-4.6863
nicotine	ACE2	0.118932	4.16356	1.13519	0.264069	0.734693	-4.88343
chlorambucil	ACE2	0.197108	4.0623	1.12941	0.265069	0.734693	-5.39944
bendroflumethiazide	ACE2	0.153262	4.05321	1.12506	0.267	0.734693	-5.24731
loxoprofen	ACE2	0.301207	4.22423	1.14567	0.268666	0.734693	-4.59461
vinblastine	ACE2	0.127614	4.08703	1.12085	0.269064	0.734693	-6.05793
rifaximin	ACE2	0.159507	4.15338	1.14006	0.27089	0.734693	-5.2288
dienestrol	ACE2	-0.0853991	4.5208	-1.11025	0.271734	0.734693	-5.27308
procainamide	ACE2	-0.138066	3.86354	-1.11427	0.272075	0.734693	-4.64437
econazole	ACE2	-0.18674	3.88489	-1.13118	0.273218	0.734693	-5.0555
procaterol	ACE2	-0.175868	4.07331	-1.12448	0.274556	0.734693	-4.69123
atracurium	ACE2	0.162474	3.99487	1.11853	0.275721	0.734693	-5.10187
amiodarone	ACE2	0.105748	4.13181	1.09786	0.27584	0.734693	-5.46062
warfarin	ACE2	0.0859118	4.12425	1.09839	0.276589	0.734693	-4.95555
thioproperazine	ACE2	-0.163691	3.8015	-1.11547	0.277423	0.734693	-4.62655
pilocarpine	ACE2	-0.115286	3.95637	-1.11212	0.277696	0.734693	-4.68016
cefdinir	ACE2	-0.169836	3.83765	-1.09902	0.282335	0.741757	-4.8439
flumazenil	ACE2	0.14047	4.12587	1.09247	0.282683	0.741757	-5.26144
pargyline	ACE2	0.118729	3.87763	1.09602	0.284542	0.741757	-4.67263
rescinnamine	ACE2	-0.0966313	3.99158	-1.10119	0.284782	0.741757	-5.25381
axitinib	ACE2	0.159341	4.15828	1.09649	0.286088	0.742284	-5.24863
testosterone	ACE2	0.1272	4.0504	1.06419	0.291141	0.745406	-5.59813
equilin	ACE2	-0.105502	4.3223	-1.06129	0.292445	0.745406	-4.94693
fluconazole	ACE2	0.141873	4.02957	1.06963	0.29263	0.745406	-4.70039
mephentermine	ACE2	0.157454	4.03724	1.07236	0.293273	0.745406	-5.0287
fluticasone	ACE2	-0.136813	3.92423	-1.06171	0.293818	0.745406	-5.42228
caffeine	ACE2	-0.0866545	3.93527	-1.06582	0.295632	0.745406	-5.01644
albendazole	ACE2	0.118224	4.08272	1.05713	0.296025	0.745406	-6.00052
etoposide	ACE2	-0.0948093	4.02714	-1.05796	0.296166	0.745406	-6.0879
nitrendipine	ACE2	0.124872	4.19912	1.04494	0.300416	0.746711	-4.84106
mirtazapine	ACE2	0.109584	4.06833	1.04521	0.300527	0.746711	-5.07792
rivaroxaban	ACE2	0.158227	4.14285	1.06474	0.300599	0.746711	-5.51504
fluorometholone	ACE2	0.110351	4.23711	1.05333	0.301705	0.746711	-4.98018
benperidol	ACE2	-0.116515	3.88408	-1.05464	0.30224	0.746711	-4.86626
trimipramine	ACE2	0.163258	4.11097	1.04848	0.303811	0.747842	-5.17928
clonidine	ACE2	0.14603	4.19327	1.03256	0.306355	0.751353	-4.98153
bezafibrate	ACE2	0.32138	4.08867	1.03476	0.311468	0.75775	-4.651
anastrozole	ACE2	-0.142895	3.85112	-1.0335	0.311485	0.75775	-4.63111
temozolomide	ACE2	-0.0905997	4.14501	-1.01853	0.313683	0.75775	-5.13187
mitotane	ACE2	0.291268	4.12423	1.01869	0.317276	0.75775	-4.99793
memantine	ACE2	0.187404	4.14685	1.01113	0.318761	0.75775	-4.71138
thiotepa	ACE2	0.284848	4.11679	1.01761	0.320346	0.75775	-5.30944
clioquinol	ACE2	0.263433	4.34292	1.00571	0.323584	0.75775	-4.69123
orphenadrine	ACE2	-0.0928481	3.77184	-1.00589	0.32518	0.75775	-4.69445
alclometasone	ACE2	0.235749	4.06837	0.999762	0.326118	0.75775	-4.65654
minaprine	ACE2	0.169549	4.24855	0.999954	0.32638	0.75775	-4.84509
iloperidone	ACE2	0.231595	4.18696	1.009	0.326533	0.75775	-5.47975
repaglinide	ACE2	0.0953736	4.2082	0.991611	0.327221	0.75775	-5.27626
biotin	ACE2	-0.135632	3.84159	-0.99375	0.328328	0.75775	-4.74971
rosiglitazone	ACE2	0.0749089	4.02839	0.982413	0.329556	0.75775	-5.54423
modafinil	ACE2	0.123441	4.06041	0.985143	0.330873	0.75775	-5.05321
pancuronium	ACE2	-0.12638	3.98595	-0.993439	0.331122	0.75775	-4.73207
meclizine	ACE2	-0.100168	3.83238	-0.98303	0.331922	0.75775	-4.816
mianserin	ACE2	-0.0862048	3.87848	-0.989362	0.332428	0.75775	-4.91478
pantoprazole	ACE2	0.135353	4.09197	0.981727	0.33372	0.75775	-4.78449
nitazoxanide	ACE2	0.171532	4.15939	0.990655	0.336261	0.75775	-5.60375
lorazepam	ACE2	0.320621	4.23394	0.988902	0.337215	0.75775	-4.64982
imipramine	ACE2	0.0916632	4.04588	0.963246	0.338849	0.75775	-4.85864
doxercalciferol	ACE2	-0.172542	3.89791	-0.98327	0.338943	0.75775	-4.93446
haloperidol	ACE2	-0.0975903	4.00808	-0.966837	0.339048	0.75775	-4.85939
efavirenz	ACE2	-0.10792	3.96005	-0.974205	0.340219	0.75775	-5.23269
deferiprone	ACE2	-0.106182	4.02053	-0.981348	0.34043	0.75775	-5.21064
penciclovir	ACE2	-0.101277	3.96337	-0.969767	0.3424	0.75775	-5.14956
ibuprofen	ACE2	0.126445	4.19056	0.960893	0.343105	0.75775	-4.92742
bepridil	ACE2	0.109421	4.03662	0.962761	0.344301	0.75775	-4.96472
mepyramine	ACE2	-0.106339	3.87481	-0.964492	0.344494	0.75775	-4.75978
pergolide	ACE2	0.148263	4.05765	0.94751	0.348857	0.75775	-4.82654
ethambutol	ACE2	0.116516	4.00929	0.955849	0.349733	0.75775	-4.71072
aripiprazole	ACE2	0.159006	4.12864	0.955017	0.349758	0.75775	-5.44281
nicotinamide	ACE2	-0.150583	3.8486	-0.953631	0.350653	0.75775	-4.98742
levocetirizine	ACE2	0.132332	4.13979	0.958438	0.351517	0.75775	-4.70083
didanosine	ACE2	0.158092	4.07127	0.950955	0.351835	0.75775	-5.2492
cinalukast	ACE2	0.157889	3.90406	0.958225	0.352319	0.75775	-4.65344
triamcinolone	ACE2	-0.0550506	4.06292	-0.933881	0.35287	0.75775	-5.56826
vardenafil	ACE2	0.122452	3.9973	0.942053	0.35294	0.75775	-4.73845
naftifine	ACE2	0.108919	3.99088	0.93165	0.359022	0.765967	-5.40155
dosulepin	ACE2	0.114578	4.09719	0.937352	0.360663	0.765967	-4.70307
atomoxetine	ACE2	0.0749618	3.97371	0.925589	0.36073	0.765967	-4.8799
diloxanide	ACE2	0.103768	4.03048	0.925908	0.362547	0.765967	-4.76753
pentoxifylline	ACE2	0.0847119	4.02959	0.9195	0.363409	0.765967	-4.86925
treprostinil	ACE2	-0.150166	3.8787	-0.930573	0.363738	0.765967	-5.66839
dolasetron	ACE2	-0.108575	3.86828	-0.9238	0.364746	0.765967	-4.68869
flupirtine	ACE2	0.100007	4.1529	0.922995	0.368416	0.769596	-5.51501
indapamide	ACE2	0.0740742	4.05798	0.904647	0.368765	0.769596	-4.99384
rizatriptan	ACE2	-0.0902875	3.97133	-0.904247	0.37198	0.7716	-4.79973
cerivastatin	ACE2	0.153054	4.15015	0.917982	0.372021	0.7716	-6.12459
tiagabine	ACE2	0.320164	4.23371	0.91255	0.374868	0.772371	-4.65834
erythromycin	ACE2	0.11666	4.06567	0.889674	0.376663	0.772371	-5.7115
liothyronine	ACE2	-0.0972042	4.1626	-0.897686	0.377331	0.772371	-5.2994
ketorolac	ACE2	0.214837	4.14032	0.890279	0.378579	0.772371	-4.80223
moxifloxacin	ACE2	-0.0852907	4.0142	-0.887686	0.380377	0.772371	-4.99357
prazosin	ACE2	0.0669164	4.05222	0.886357	0.381058	0.772371	-4.8273
levofloxacin	ACE2	-0.103957	4.02165	-0.898605	0.38153	0.772371	-4.90724
sotalol	ACE2	0.111134	4.21608	0.884619	0.381588	0.772371	-5.05032
erlotinib	ACE2	0.104487	4.14769	0.88373	0.385007	0.775829	-5.15276
diclofenac	ACE2	-0.0841612	4.01256	-0.876854	0.385605	0.775829	-4.88173
oxprenolol	ACE2	0.161605	4.2339	0.878557	0.387736	0.777786	-4.79105
pioglitazone	ACE2	0.170502	4.06877	0.854481	0.397782	0.793802	-5.4687
tranilast	ACE2	-0.067272	3.88989	-0.850952	0.398654	0.793802	-4.92833
progesterone	ACE2	0.0782238	4.16046	0.845019	0.401781	0.793802	-5.46075
cyproheptadine	ACE2	0.107077	3.92436	0.852998	0.401859	0.793802	-5.59944
nonoxynol-9	ACE2	0.172788	4.06465	0.856675	0.403214	0.793802	-5.98886
nitrazepam	ACE2	0.274611	4.21093	0.856544	0.404341	0.793802	-5.5872
maprotiline	ACE2	-0.057644	4.0195	-0.836067	0.40674	0.793802	-5.79201
nadolol	ACE2	0.0604849	3.96782	0.830777	0.409342	0.793802	-5.02451
vindesine	ACE2	0.129569	4.11051	0.845409	0.410653	0.793802	-5.97355
nicorandil	ACE2	0.117481	4.05096	0.837664	0.411187	0.793802	-5.04011
nisoldipine	ACE2	-0.138236	3.95868	-0.837124	0.412221	0.793802	-5.65785
amoxapine	ACE2	0.0711676	4.03602	0.824763	0.412446	0.793802	-5.4096
amitriptyline	ACE2	-0.122853	3.86655	-0.834026	0.412622	0.793802	-5.23541
hexylcaine	ACE2	-0.131506	3.83018	-0.834914	0.413261	0.793802	-5.16106
esculin	ACE2	0.172925	4.00621	0.832709	0.413438	0.793802	-4.76299
gatifloxacin	ACE2	-0.0863119	4.12164	-0.825022	0.417592	0.798292	-5.29534
resveratrol	ACE2	0.0731218	4.12552	0.813335	0.418153	0.798292	-5.68488
carteolol	ACE2	0.193198	4.04533	0.820917	0.420088	0.799714	-4.71783
prednicarbate	ACE2	0.144973	4.03948	0.811902	0.424922	0.806632	-5.10712
phenazopyridine	ACE2	-0.0916063	3.79425	-0.799128	0.432497	0.815796	-5.3055
bicalutamide	ACE2	-0.0876585	3.96608	-0.791126	0.43347	0.815796	-4.86242
clemastine	ACE2	-0.0823146	3.9546	-0.794929	0.433706	0.815796	-5.58254
betahistine	ACE2	0.166739	4.0321	0.795327	0.434605	0.815796	-4.76409
trioxsalen	ACE2	0.0688357	3.98315	0.79124	0.436606	0.817267	-5.50257
raltegravir	ACE2	-0.116186	4.02073	-0.791625	0.438465	0.818467	-4.83308
decitabine	ACE2	-0.133972	3.93853	-0.78438	0.442739	0.821032	-5.41735
verteporfin	ACE2	0.320444	4.20402	0.77627	0.444499	0.821032	-4.97863
sertraline	ACE2	0.0585187	4.02252	0.768235	0.446768	0.821032	-6.37957
nefopam	ACE2	0.163362	4.00966	0.772249	0.447703	0.821032	-4.78024
rolitetracycline	ACE2	0.117695	3.95537	0.771786	0.449779	0.821032	-5.39236
practolol	ACE2	0.156596	4.01136	0.766027	0.450243	0.821032	-5.12525
propoxycaine	ACE2	-0.0841138	3.98233	-0.768789	0.450449	0.821032	-4.78795
minoxidil	ACE2	-0.0482986	4.05236	-0.757214	0.451946	0.821032	-5.67864
teicoplanin	ACE2	0.12308	4.12528	0.763063	0.454843	0.821032	-5.66335
doxylamine	ACE2	-0.0788371	4.00405	-0.754229	0.454955	0.821032	-4.90604
alitretinoin	ACE2	-0.0726695	3.97243	-0.755441	0.455057	0.821032	-5.81994
triamterene	ACE2	-0.0567448	3.90609	-0.748347	0.456801	0.821032	-5.86306
midazolam	ACE2	0.279568	4.21341	0.762324	0.456896	0.821032	-5.25558
clomipramine	ACE2	0.0647975	3.90241	0.749018	0.458497	0.821032	-5.61575
papaverine	ACE2	0.075295	3.8777	0.751086	0.460289	0.821032	-5.89107
chloroquine	ACE2	0.0790949	4.25657	0.742075	0.461277	0.821032	-5.82087
oxybuprocaine	ACE2	-0.0916302	3.84683	-0.743014	0.463281	0.821032	-4.97558
zafirlukast	ACE2	-0.0718443	3.94595	-0.738254	0.464927	0.821032	-5.72299
levetiracetam	ACE2	0.0980251	4.06303	0.743041	0.465065	0.821032	-4.97503
ephedrine	ACE2	0.231815	4.40018	0.743151	0.46601	0.821032	-5.01262
eugenol	ACE2	0.102175	4.33536	0.738435	0.46871	0.821032	-4.7507
betaxolol	ACE2	0.060344	4.01641	0.730194	0.4698	0.821032	-4.94105
fexofenadine	ACE2	0.0980245	4.02761	0.732502	0.470069	0.821032	-4.84724
dactinomycin	ACE2	-0.163642	3.96123	-0.73724	0.470143	0.821032	-6.69809
carbamazepine	ACE2	0.0919687	3.98128	0.726725	0.471348	0.821032	-5.48183
clarithromycin	ACE2	-0.0678613	4.01521	-0.731918	0.47174	0.821032	-5.08409
lisuride	ACE2	0.149193	4.04391	0.733808	0.472826	0.821032	-4.75596
bosutinib	ACE2	0.117222	4.12235	0.729982	0.474448	0.821724	-6.11571
diethylcarbamazine	ACE2	0.0606881	4.05693	0.72018	0.47749	0.82362	-4.8377
methotrexate	ACE2	-0.0955866	4.0308	-0.71676	0.478071	0.82362	-6.41624
dicloxacillin	ACE2	0.0761474	4.01204	0.716212	0.481466	0.82362	-5.73402
bumetanide	ACE2	-0.0636857	3.90538	-0.705689	0.4828	0.82362	-5.59816
fulvestrant	ACE2	0.0333071	4.23436	0.700227	0.484488	0.82362	-6.31013
phensuximide	ACE2	-0.0788376	4.17178	-0.707072	0.485604	0.82362	-5.38013
goserelin	ACE2	-0.111397	3.84083	-0.709622	0.486638	0.82362	-5.1857
tocainide	ACE2	-0.0518093	4.13461	-0.700986	0.487291	0.82362	-5.42559
oxiconazole	ACE2	0.100519	4.06427	0.700902	0.490587	0.82362	-5.56122
ivermectin	ACE2	0.103573	3.97977	0.700007	0.490754	0.82362	-6.53744
topiramate	ACE2	0.0797088	4.08899	0.69894	0.491688	0.82362	-4.9018
alfuzosin	ACE2	-0.0649147	3.95106	-0.693624	0.491759	0.82362	-4.99882
mepivacaine	ACE2	-0.102794	3.86476	-0.694973	0.493821	0.82362	-4.86699
rabeprazole	ACE2	-0.0635167	4.04873	-0.696657	0.493864	0.82362	-4.81474
mebeverine	ACE2	0.110558	4.03719	0.693203	0.494242	0.82362	-4.7849
dydrogesterone	ACE2	0.0579423	3.93837	0.689587	0.495801	0.82362	-4.91366
amiloride	ACE2	0.0770709	4.08161	0.68351	0.497117	0.82362	-5.15034
flunisolide	ACE2	-0.0556458	3.9486	-0.682259	0.498182	0.82362	-5.50195
sitagliptin	ACE2	0.0776324	4.11743	0.688848	0.498972	0.82362	-5.51126
hexylresorcinol	ACE2	-0.101153	4.2337	-0.684319	0.501421	0.82362	-5.29356
argatroban	ACE2	0.0755349	4.05178	0.682722	0.501738	0.82362	-4.91322
zalcitabine	ACE2	0.0970688	4.09767	0.680786	0.502951	0.82362	-4.84049
yohimbine	ACE2	-0.0578261	4.03983	-0.672763	0.503732	0.82362	-5.10839
tetrabenazine	ACE2	0.0678111	4.31818	0.674247	0.507561	0.827398	-4.99826
leflunomide	ACE2	-0.0674369	3.86212	-0.668471	0.509135	0.827398	-5.84416
talniflumate	ACE2	0.0893675	3.96443	0.668046	0.510543	0.827398	-5.28156
diphenidol	ACE2	-0.107195	3.82739	-0.665239	0.512882	0.827398	-4.83236
raltitrexed	ACE2	-0.0764234	3.95212	-0.659464	0.513849	0.827398	-6.17325
paclitaxel	ACE2	-0.0601399	3.90037	-0.656199	0.51466	0.827398	-6.35886
dopamine	ACE2	-0.0467944	3.90582	-0.65947	0.514661	0.827398	-5.50117
bromocriptine	ACE2	0.0474442	4.07516	0.651778	0.517007	0.827566	-5.52144
irinotecan	ACE2	-0.0939864	3.95534	-0.652164	0.518375	0.827566	-6.29852
brimonidine	ACE2	-0.0523608	3.96011	-0.651261	0.519536	0.827566	-4.92586
carvedilol	ACE2	-0.0485161	4.08309	-0.648522	0.520041	0.827566	-5.81097
scopolamine	ACE2	0.0881693	3.95516	0.644708	0.520923	0.827566	-5.11532
terconazole	ACE2	0.0912661	3.98797	0.646994	0.523892	0.83022	-4.842
terazosin	ACE2	-0.0578916	3.9873	-0.641183	0.525498	0.83022	-5.02743
polydatin	ACE2	-0.0993928	4.02393	-0.64733	0.5263	0.83022	-4.89732
enalapril	ACE2	0.0413142	3.95703	0.633919	0.529683	0.8336	-5.43676
sulpiride	ACE2	0.0901805	3.95721	0.636972	0.531816	0.834699	-4.81899
sulfasalazine	ACE2	-0.097925	3.96505	-0.633473	0.532866	0.834699	-4.78829
tegafur	ACE2	0.211096	4.17917	0.633887	0.535082	0.836221	-4.7558
desloratadine	ACE2	0.141905	4.12009	0.624502	0.538614	0.837579	-5.55708
metronidazole	ACE2	-0.0784538	3.98958	-0.62657	0.540062	0.837579	-5.1648
nilutamide	ACE2	0.102564	4.01476	0.621532	0.540747	0.837579	-5.10664
tinidazole	ACE2	0.178114	3.97969	0.619293	0.541464	0.837579	-4.79
diclofenamide	ACE2	0.0697798	3.97131	0.616603	0.542183	0.837579	-5.07593
zileuton	ACE2	-0.0766074	3.97571	-0.616538	0.543772	0.838107	-5.48463
rilmenidine	ACE2	0.0658584	4.18749	0.5925	0.556979	0.856498	-5.78732
esomeprazole	ACE2	0.212921	4.18009	0.589271	0.563914	0.864669	-4.78404
alprazolam	ACE2	0.0988929	4.12307	0.582992	0.56783	0.864669	-5.78228
enalaprilat	ACE2	0.0975643	4.12241	0.58105	0.569044	0.864669	-5.07111
phenelzine	ACE2	0.0698398	4.03796	0.574302	0.569359	0.864669	-4.84873
nevirapine	ACE2	-0.0560438	3.94073	-0.574423	0.569864	0.864669	-4.96931
triflupromazine	ACE2	0.0957756	4.0298	0.570362	0.573243	0.864669	-5.85952
elvitegravir	ACE2	0.118455	4.1157	0.573717	0.57346	0.864669	-6.03574
atovaquone	ACE2	-0.0539573	4.15495	-0.56845	0.57446	0.864669	-5.3021
flavoxate	ACE2	-0.0537028	3.94824	-0.568404	0.574886	0.864669	-4.95519
zolmitriptan	ACE2	-0.0655484	3.9033	-0.564361	0.576283	0.864669	-4.867
clotrimazole	ACE2	0.0984844	4.04146	0.566861	0.576446	0.864669	-5.84323
perhexiline	ACE2	0.0838797	4.35491	0.557644	0.580507	0.868778	-6.1905
donepezil	ACE2	0.0771989	4.05507	0.553982	0.583063	0.868778	-5.27161
finasteride	ACE2	-0.0787896	3.93726	-0.550726	0.583959	0.868778	-5.10106
lofexidine	ACE2	-0.0449897	3.86814	-0.551682	0.586191	0.868778	-4.83897
diflorasone	ACE2	0.062229	3.93504	0.551699	0.586792	0.868778	-5.27701
levocabastine	ACE2	0.105657	4.07721	0.551659	0.586942	0.868778	-4.81084
flunarizine	ACE2	-0.0733548	3.91698	-0.54091	0.591088	0.872072	-5.59268
benzylpenicillin	ACE2	0.0836021	4.01617	0.544268	0.591763	0.872072	-5.75248
butoconazole	ACE2	-0.0799467	3.93829	-0.537849	0.597473	0.877703	-5.06303
calcitriol	ACE2	0.0475767	4.09214	0.5291	0.600317	0.877703	-5.74833
ritodrine	ACE2	0.0565045	4.17343	0.525591	0.602408	0.877703	-5.53464
dobutamine	ACE2	0.0623744	3.84945	0.527244	0.603291	0.877703	-5.21658
rifabutin	ACE2	0.0624791	4.08687	0.523872	0.603351	0.877703	-5.97593
nifedipine	ACE2	0.0533296	4.1211	0.521198	0.604194	0.877703	-6.00492
pheniramine	ACE2	-0.0627731	3.78688	-0.525183	0.604727	0.877703	-4.8129
stavudine	ACE2	0.0763907	4.04013	0.512427	0.611357	0.882138	-5.38922
melperone	ACE2	0.0903906	3.9945	0.510851	0.61252	0.882138	-5.30356
dexketoprofen	ACE2	0.0925407	4.11001	0.514686	0.612806	0.882138	-5.25502
valsartan	ACE2	0.0503074	4.02038	0.507433	0.614247	0.882138	-5.09338
oxymetholone	ACE2	0.0468572	4.09705	0.513699	0.614346	0.882138	-5.85464
formoterol	ACE2	-0.0404246	3.98333	-0.503948	0.61731	0.882561	-5.70515
sorafenib	ACE2	0.0635869	4.14576	0.501016	0.618338	0.882561	-6.60123
icosapent	ACE2	0.0833833	4.32596	0.505472	0.618749	0.882561	-4.81317
riluzole	ACE2	-0.083336	3.9417	-0.497707	0.621693	0.882561	-5.23075
torasemide	ACE2	0.0713302	4.19618	0.4967	0.622071	0.882561	-5.07467
guanabenz	ACE2	-0.0378939	4.04678	-0.495522	0.622713	0.882561	-5.02481
propofol	ACE2	0.0495155	4.00694	0.496886	0.623834	0.882561	-5.02227
ketotifen	ACE2	0.0743228	4.05693	0.488996	0.627136	0.884536	-5.47939
tolazoline	ACE2	-0.0425618	4.05604	-0.48583	0.629631	0.884536	-5.04793
vemurafenib	ACE2	-0.040853	4.24677	-0.485163	0.63004	0.884536	-6.36275
thiocolchicoside	ACE2	-0.0659	3.90896	-0.486237	0.631923	0.884536	-5.23777
olopatadine	ACE2	0.063767	3.95445	0.483324	0.633171	0.884536	-4.78987
oxymetazoline	ACE2	0.0793464	3.86479	0.485168	0.633857	0.884536	-4.91312
docetaxel	ACE2	0.0508493	4.0881	0.478179	0.635145	0.884536	-6.27845
tubocurarine	ACE2	-0.0451182	3.93619	-0.477208	0.63576	0.884536	-5.34703
mafenide	ACE2	-0.0729327	4.05931	-0.475539	0.638763	0.886197	-4.86601
pirenzepine	ACE2	0.0890269	3.97249	0.474361	0.639591	0.886197	-4.90023
pyrimethamine	ACE2	0.0516385	3.96029	0.462198	0.645403	0.892409	-6.2467
medrysone	ACE2	-0.037401	3.91297	-0.458909	0.647972	0.893711	-5.76349
nicergoline	ACE2	0.0494055	4.01327	0.460626	0.649005	0.893711	-4.81549
doxorubicin	ACE2	0.0409432	4.44093	0.455615	0.650606	0.894084	-7.16417
halcinonide	ACE2	0.0571005	3.81535	0.448654	0.657312	0.897012	-5.45896
niacin	ACE2	-0.0777671	3.85764	-0.448751	0.658769	0.897012	-5.11384
clofarabine	ACE2	-0.0837112	3.81584	-0.445158	0.660439	0.897012	-6.33604
ketoprofen	ACE2	0.0604744	3.96484	0.44464	0.660775	0.897012	-4.86027
epirizole	ACE2	0.038682	3.84487	0.441804	0.661213	0.897012	-5.28474
diphenhydramine	ACE2	-0.0460693	3.96919	-0.442479	0.662399	0.897012	-4.92699
galantamine	ACE2	0.0517125	4.16789	0.439706	0.66248	0.897012	-5.01526
trazodone	ACE2	0.0863254	4.05886	0.437077	0.664384	0.897012	-4.99334
altretamine	ACE2	0.0509395	4.0385	0.435169	0.665743	0.897012	-4.99778
nimodipine	ACE2	0.0463649	4.1246	0.432521	0.666897	0.897012	-5.52855
fursultiamine	ACE2	-0.0654168	4.25156	-0.435801	0.667477	0.897012	-5.05813
methylergometrine	ACE2	-0.0390833	4.01584	-0.43029	0.668995	0.897012	-5.53454
nortriptyline	ACE2	-0.0433691	3.79903	-0.430907	0.670802	0.897012	-5.86013
solifenacin	ACE2	0.062711	4.31563	0.430579	0.671424	0.897012	-4.84924
iloprost	ACE2	-0.055097	4.05106	-0.426698	0.674289	0.897324	-5.60606
articaine	ACE2	0.0447162	4.22946	0.424727	0.674576	0.897324	-4.94607
fluoxetine	ACE2	-0.0326717	4.10859	-0.42149	0.675664	0.897324	-5.68195
bisacodyl	ACE2	-0.0715307	3.92344	-0.417478	0.679687	0.899414	-6.21467
zonisamide	ACE2	-0.0569199	4.15347	-0.415881	0.680883	0.899414	-4.92828
cinnarizine	ACE2	0.0588899	3.92209	0.414412	0.681547	0.899414	-4.97335
carprofen	ACE2	-0.0368631	3.96375	-0.412401	0.683735	0.899414	-4.99223
azithromycin	ACE2	0.0583921	4.04014	0.412623	0.68393	0.899414	-5.62798
saquinavir	ACE2	0.0490825	4.00898	0.403991	0.688191	0.902856	-5.04442
homosalate	ACE2	0.0403464	4.00236	0.404815	0.689234	0.902856	-5.62145
acitretin	ACE2	0.0355864	4.03004	0.396101	0.695428	0.909198	-6.01205
piroxicam	ACE2	-0.038342	4.04923	-0.388825	0.6993	0.912484	-5.79345
reserpine	ACE2	0.0400571	4.00221	0.379358	0.707856	0.921859	-5.90335
zolpidem	ACE2	-0.0357312	4.01148	-0.3734	0.711414	0.921965	-5.23293
mebendazole	ACE2	-0.0348861	4.30369	-0.371217	0.711834	0.921965	-6.58155
milrinone	ACE2	-0.0400918	3.9644	-0.370769	0.7126	0.921965	-5.86174
rofecoxib	ACE2	0.0568344	4.02311	0.369768	0.713425	0.921965	-5.53941
ziprasidone	ACE2	-0.0704783	3.93836	-0.369957	0.715799	0.922994	-5.96371
olmesartan	ACE2	0.133686	4.14047	0.369028	0.716969	0.922994	-4.82769
loratadine	ACE2	0.0673237	4.04767	0.364538	0.718875	0.923678	-5.38659
metolazone	ACE2	0.0568913	3.92313	0.358439	0.722961	0.927156	-4.93101
iobenguane	ACE2	0.0430819	3.93356	0.35562	0.725754	0.928406	-4.93849
loteprednol	ACE2	0.0461679	4.09671	0.355744	0.726699	0.928406	-5.63651
ciprofibrate	ACE2	0.031601	3.94359	0.348886	0.729722	0.929024	-5.50607
diazepam	ACE2	0.0435366	3.91743	0.348483	0.729947	0.929024	-5.54108
metrizamide	ACE2	-0.0349282	4.16447	-0.345394	0.732495	0.930504	-5.61353
estrone	ACE2	0.0224228	4.43087	0.331076	0.741594	0.939999	-5.64407
nimesulide	ACE2	-0.0557037	3.86972	-0.332362	0.742767	0.939999	-4.88846
aminoglutethimide	ACE2	0.0740001	3.9997	0.325517	0.746466	0.941571	-4.977
triclosan	ACE2	0.0528815	4.00504	0.324303	0.74815	0.941571	-5.88996
methoxsalen	ACE2	0.0476621	4.20046	0.322067	0.749179	0.941571	-5.1485
cefotaxime	ACE2	0.0495573	3.97581	0.323255	0.749614	0.941571	-5.53104
oxcarbazepine	ACE2	-0.0487275	3.95584	-0.317088	0.754201	0.944091	-5.45737
pizotifen	ACE2	0.0312924	4.0211	0.314935	0.75443	0.944091	-5.64816
buspirone	ACE2	-0.0366674	3.97674	-0.311152	0.757504	0.946176	-5.45121
cinacalcet	ACE2	0.069485	4.1059	0.308888	0.761107	0.948284	-5.6878
bisoprolol	ACE2	0.0434353	4.03819	0.303708	0.763111	0.948284	-5.69301
nicardipine	ACE2	-0.0258139	4.10073	-0.301901	0.763425	0.948284	-5.91181
ramipril	ACE2	-0.0276442	4.07783	-0.300287	0.765101	0.948613	-5.19366
esmolol	ACE2	0.0366355	3.99186	0.29889	0.767879	0.950303	-4.95268
isoxsuprine	ACE2	0.0296666	4.05918	0.293708	0.770278	0.950665	-5.6845
chlorthalidone	ACE2	-0.0319828	4.00823	-0.293011	0.771001	0.950665	-5.55792
daunorubicin	ACE2	0.0442331	4.24249	0.287615	0.774811	0.951884	-7.41795
naphazoline	ACE2	-0.0370638	3.79326	-0.288929	0.775373	0.951884	-4.91429
pivmecillinam	ACE2	-0.0372937	4.01069	-0.28714	0.776239	0.951884	-4.90799
chlordiazepoxide	ACE2	-0.0443703	3.87434	-0.282062	0.780989	0.954973	-5.34057
metoprolol	ACE2	0.0319325	3.85602	0.279866	0.782158	0.954973	-4.86811
ondansetron	ACE2	0.0234015	4.13048	0.275862	0.783731	0.954973	-5.26927
clofibrate	ACE2	-0.0270495	3.96507	-0.276202	0.784442	0.954973	-4.9809
pipamperone	ACE2	0.0330705	3.9909	0.271611	0.788494	0.95817	-5.57565
sunitinib	ACE2	-0.0390672	4.04421	-0.269646	0.79041	0.958764	-6.41249
lenalidomide	ACE2	0.0540765	4.10565	0.266011	0.793082	0.960273	-4.81474
paroxetine	ACE2	-0.0188248	3.99958	-0.255043	0.799308	0.96607	-6.25172
ranitidine	ACE2	0.0282485	3.94973	0.247738	0.805066	0.967807	-5.60382
trimethobenzamide	ACE2	-0.0345005	3.91073	-0.248956	0.805571	0.967807	-4.93314
mesoridazine	ACE2	-0.0193965	4.12066	-0.246752	0.805977	0.967807	-5.39867
cephalexin	ACE2	-0.04068	3.90466	-0.248269	0.806506	0.967807	-5.25997
indinavir	ACE2	-0.0289654	4.0687	-0.246307	0.808654	0.968655	-4.89006
phenolphthalein	ACE2	-0.0369704	3.95588	-0.241842	0.811172	0.969943	-6.03213
dantrolene	ACE2	-0.0202335	3.95035	-0.237452	0.813524	0.971027	-5.20588
tegaserod	ACE2	-0.0402357	4.05351	-0.232304	0.819162	0.976023	-6.2126
imiquimod	ACE2	0.0463544	4.40835	0.226645	0.822599	0.976094	-5.64629
febuxostat	ACE2	-0.0164	3.79424	-0.225433	0.824579	0.976094	-5.35449
procarbazine	ACE2	0.0370979	4.03731	0.2206	0.826593	0.976094	-5.11979
dextromethorphan	ACE2	-0.0338638	4.06381	-0.22013	0.826673	0.976094	-5.27917
perindopril	ACE2	-0.0226745	3.96726	-0.219068	0.828214	0.976094	-5.04631
mesalazine	ACE2	-0.0236973	4.02379	-0.21941	0.828431	0.976094	-5.162
famotidine	ACE2	0.0277112	3.98591	0.215785	0.831169	0.976094	-5.26294
guanfacine	ACE2	0.0556638	4.0022	0.213537	0.832964	0.976094	-4.87079
fluspirilene	ACE2	0.024421	3.93996	0.211659	0.834109	0.976094	-6.32877
flubendazole	ACE2	-0.0259737	4.04834	-0.210293	0.8354	0.976094	-6.53435
resorcinol	ACE2	0.0478323	3.99828	0.208589	0.836768	0.976094	-4.83689
nefazodone	ACE2	0.0230867	4.03121	0.207207	0.837177	0.976094	-5.46609
labetalol	ACE2	-0.021919	3.92535	-0.203335	0.839444	0.976094	-5.65231
hydrocortisone	ACE2	0.0214267	3.96281	0.203306	0.839557	0.976094	-5.26635
trapidil	ACE2	-0.0286507	3.97322	-0.20059	0.842839	0.976552	-4.88281
terbinafine	ACE2	-0.0198629	3.99406	-0.199892	0.842857	0.976552	-4.96687
brinzolamide	ACE2	0.0218993	3.89194	0.197167	0.845538	0.977971	-4.97088
amodiaquine	ACE2	-0.0345273	3.94763	-0.193192	0.848475	0.979683	-4.94837
flecainide	ACE2	0.0181664	4.01377	0.188269	0.851578	0.980894	-5.81056
isocarboxazid	ACE2	0.0208806	3.95201	0.187796	0.852692	0.980894	-4.94495
benidipine	ACE2	-0.02015	4.06355	-0.184731	0.855724	0.980894	-5.11769
dasatinib	ACE2	-0.0296026	4.13081	-0.183026	0.856478	0.980894	-6.16832
temsirolimus	ACE2	-0.0214344	4.37445	-0.182337	0.856823	0.980894	-6.31342
raloxifene	ACE2	0.0129381	4.62394	0.177042	0.859793	0.981523	-6.47866
sibutramine	ACE2	0.0173879	3.97344	0.176892	0.860396	0.981523	-5.52051
sildenafil	ACE2	-0.0209753	4.1939	-0.175399	0.861754	0.981523	-5.28621
verapamil	ACE2	-0.0128699	4.1157	-0.172633	0.863543	0.981897	-5.51654
rimexolone	ACE2	-0.0333769	4.02657	-0.164342	0.870967	0.982383	-5.21345
miglitol	ACE2	-0.0229639	3.9595	-0.16339	0.871803	0.982383	-5.18663
ruxolitinib	ACE2	0.0207077	4.11988	0.160844	0.872832	0.982383	-5.91972
cimetidine	ACE2	0.0251817	3.93974	0.156857	0.876005	0.982383	-5.4074
disopyramide	ACE2	-0.0178131	3.98484	-0.156546	0.876343	0.982383	-5.12536
terfenadine	ACE2	0.0164604	3.9274	0.155603	0.877517	0.982383	-6.35613
xanthinol	ACE2	-0.0377015	3.87768	-0.154933	0.87853	0.982383	-5.18265
naloxone	ACE2	0.0134446	4.06903	0.150764	0.880445	0.982383	-5.40436
lamivudine	ACE2	0.0226841	4.02759	0.151397	0.880517	0.982383	-5.31048
alprostadil	ACE2	-0.0200094	4.0299	-0.152414	0.880562	0.982383	-4.81923
naltrexone	ACE2	0.0100816	4.17482	0.150232	0.880897	0.982383	-5.62384
mexiletine	ACE2	0.0275247	3.97253	0.150102	0.881513	0.982383	-4.97556
metixene	ACE2	-0.0223355	4.17077	-0.147529	0.883832	0.982509	-5.1264
cefaclor	ACE2	-0.0202318	3.88052	-0.146741	0.884551	0.982509	-4.83843
omeprazole	ACE2	0.0151791	3.93375	0.138201	0.890782	0.986665	-5.13273
diethylstilbestrol	ACE2	0.0121422	4.58871	0.137236	0.891229	0.986665	-5.64244
diazoxide	ACE2	0.0146663	3.91968	0.135072	0.893315	0.987348	-5.58852
flupentixol	ACE2	-0.0193651	4.05554	-0.132615	0.896088	0.988458	-6.01131
primaquine	ACE2	-0.0205025	3.94025	-0.130312	0.897261	0.988458	-5.49752
pentobarbital	ACE2	-0.0177682	4.18644	-0.12603	0.90072	0.990028	-6.03075
nitrofural	ACE2	0.0178572	4.19086	0.122798	0.903198	0.990028	-5.64678
nizatidine	ACE2	0.0117649	3.97863	0.119624	0.905212	0.990028	-5.32143
aprepitant	ACE2	0.0116898	4.01809	0.117332	0.907542	0.990028	-5.45587
brompheniramine	ACE2	0.00998708	4.09376	0.11595	0.908445	0.990028	-5.7704
entecavir	ACE2	-0.0184057	4.20798	-0.111967	0.912275	0.990028	-5.73001
proguanil	ACE2	-0.0243774	3.97	-0.108574	0.914473	0.990028	-4.92132
tianeptine	ACE2	-0.0185223	4.27501	-0.106224	0.916424	0.990028	-4.99941
celecoxib	ACE2	-0.0134793	3.98591	-0.0990561	0.921581	0.990028	-4.931
nelfinavir	ACE2	-0.0109241	4.0553	-0.0991017	0.92168	0.990028	-6.39012
secnidazole	ACE2	-0.021375	4.00332	-0.0986671	0.922285	0.990028	-4.84063
norgestrel	ACE2	0.01023	3.84517	0.0980422	0.922764	0.990028	-4.95823
felodipine	ACE2	-0.0109833	3.94324	-0.0930732	0.926629	0.990028	-5.39118
meropenem	ACE2	0.00951712	4.0067	0.0919841	0.927197	0.990028	-5.51733
piretanide	ACE2	0.0200665	3.89996	0.0914114	0.927806	0.990028	-5.31643
tadalafil	ACE2	-0.00885815	3.94794	-0.0893699	0.929352	0.990028	-5.33663
pitavastatin	ACE2	0.0180394	3.86711	0.0888948	0.93022	0.990028	-6.52001
betamethasone	ACE2	-0.00934355	3.90638	-0.0862198	0.931774	0.990028	-5.88351
vecuronium	ACE2	0.0111059	3.98756	0.0831765	0.934119	0.990028	-5.29913
clobetasol	ACE2	0.0056905	3.92642	0.0767646	0.939054	0.990028	-5.93775
huperzine-a	ACE2	0.00632447	4.10932	0.0755281	0.940097	0.990028	-6.03527
mometasone	ACE2	0.00798981	3.9989	0.0756406	0.940314	0.990028	-5.73661
moxonidine	ACE2	0.00691062	4.05922	0.0747878	0.940791	0.990028	-5.10483
rosuvastatin	ACE2	-0.00803087	3.97035	-0.0725348	0.942846	0.990028	-5.59751
alimemazine	ACE2	0.00751651	4.21496	0.0711917	0.943773	0.990028	-5.98009
lidocaine	ACE2	-0.00497531	3.98375	-0.067055	0.946892	0.990028	-5.2162
granisetron	ACE2	0.00864778	3.92689	0.0656004	0.948235	0.990028	-4.94458
latanoprost	ACE2	0.0122	4.07972	0.0647204	0.949194	0.990028	-5.03858
phentolamine	ACE2	0.00622813	3.93569	0.0630275	0.950068	0.990028	-5.15717
lacidipine	ACE2	-0.00748252	4.01027	-0.0576614	0.954531	0.990028	-6.0308
felbamate	ACE2	0.00544252	4.05836	0.0567065	0.955124	0.990028	-5.12364
vinorelbine	ACE2	0.00627391	4.06989	0.0563435	0.955242	0.990028	-6.78476
salbutamol	ACE2	0.0115645	3.998	0.0562942	0.955601	0.990028	-5.51063
levonorgestrel	ACE2	0.00622649	4.04442	0.0559502	0.955631	0.990028	-5.93806
exemestane	ACE2	0.00694716	3.99817	0.0530185	0.957972	0.990028	-6.1224
tolterodine	ACE2	-0.00826779	4.06949	-0.0517564	0.959362	0.990028	-5.09105
dinoprostone	ACE2	0.00732125	3.92341	0.0503259	0.960285	0.990028	-5.72242
calcipotriol	ACE2	0.00505985	4.14456	0.0488235	0.961299	0.990028	-6.19593
escitalopram	ACE2	0.0100222	3.99971	0.0487589	0.961344	0.990028	-5.10158
zuclopenthixol	ACE2	-0.00537404	3.93374	-0.0471185	0.962734	0.990028	-5.5314
amisulpride	ACE2	-0.00710067	4.13848	-0.0448464	0.964449	0.990028	-5.20096
propranolol	ACE2	-0.005374	3.97657	-0.0443073	0.964928	0.990028	-5.08224
quinethazone	ACE2	0.00751764	4.21496	0.0438574	0.96535	0.990028	-4.99408
methylprednisolone	ACE2	0.00789043	4.02363	0.0426515	0.966535	0.990028	-4.81147
selegiline	ACE2	-0.00309434	3.94044	-0.0403085	0.96797	0.990028	-5.79979
lopinavir	ACE2	-0.00761876	4.05993	-0.0386974	0.96954	0.990028	-5.90896
cabergoline	ACE2	0.00363967	3.94281	0.037933	0.969936	0.990028	-5.62307
disulfiram	ACE2	-0.0044081	3.99002	-0.0356101	0.97191	0.990028	-4.90535
phenylbutazone	ACE2	-0.00295624	3.8737	-0.0346491	0.972661	0.990028	-5.01603
homatropine	ACE2	-0.00325467	4.21776	-0.0325843	0.974113	0.990028	-5.62541
linezolid	ACE2	0.00433959	4.06804	0.0313575	0.975145	0.990028	-5.83385
bromhexine	ACE2	0.00838023	4.03353	0.0306966	0.975743	0.990028	-4.8311
quinidine	ACE2	-0.00322445	3.98744	-0.0292453	0.976768	0.990028	-5.23469
valdecoxib	ACE2	-0.00346425	4.07189	-0.0267093	0.979009	0.990804	-5.68743
somatostatin	ACE2	-0.00398427	4.06175	-0.0206992	0.983704	0.994059	-6.2582
hyoscyamine	ACE2	-0.00178327	4.03811	-0.0153807	0.987804	0.996151	-5.16675
floxuridine	ACE2	0.00159646	4.00492	0.0142075	0.988739	0.996151	-6.47443
carbetocin	ACE2	0.00140887	4.07932	0.0082179	0.993527	0.998146	-5.32231
venlafaxine	ACE2	0.000960619	3.99518	0.00685104	0.994566	0.998146	-5.17806
alverine	ACE2	-0.000657689	3.92765	-0.00611125	0.995175	0.998146	-5.08013
losartan	ACE2	-6.71693e-05	4.01873	-0.000915637	0.999274	0.999948	-5.16383
sulfinpyrazone	ACE2	-7.38486e-06	4.07732	-6.54099e-05	0.999948	0.999948	-5.15059

## Sheet: G_all_approved_drugs_GSEA
Table 1G. Result of enrichment of ACE2-modulating genes in different drug classes using the GSEA method for all clinically approved drugs
drug class	p value	adjusted p value	enrichment score	normalized enrichment score	number of more extreme cases	number of drugs	key drugs (leadingEdge)
HDAC inhibitor	0.00380288	0.376212	0.950368	1.55255	23	3	panobinostat, belinostat
FLT3/KIT/PKC inhibitor	0.00767367	0.376212	-0.998169	-1.32898	37	1	midostaurin
dopamine receptor antagonist	0.0079429	0.376212	0.600752	1.61699	68	24	pimozide, molidone
ALK TKR inhibitor	0.0111066	0.376212	-0.996337	-1.32654	54	1	crizotinib
topoisomerase inhibito	0.0139338	0.376212	-0.994506	-1.3241	68	1	dexrazoxane
adrenergic/glutamate receptor antagonist	0.0213312	0.511949	0.990842	1.325	107	1	ifenprodil
guanylate cyclase stimulant	0.0321082	0.693538	-0.987179	-1.31435	158	1	molsidomine
PDGFR/TKR/VEGF inhibitor	0.0426091	0.765699	-0.981685	-1.30703	210	1	pazopanib
tricyclic antidepressant	0.068135	0.846219	0.827736	1.35222	429	3	protriptyline, desipramine
DNA/thymidylate synthase inhibitor	0.0714991	0.846219	0.967033	1.29316	361	1	capecitabine

## Sheet: H_all_approved_drugs_ATC_GSEA
Table 1H. Result of enrichment of ACE2-modulating genes in different ATC drug classes using the GSEA method for all clinically approved drugs
drug class	atc code	p value	adjusted p value	enrichment score	normalized enrichment score	number of more extreme cases	number of drugs	key drugs (leadingEdge)
ANTINEOPLASTIC AGENTS	L01	0.00377537	0.181218	-0.355825	-1.56101	7	82	idelalisib, ponatinib, azacitidine, topotecan, mitoxantrone, midostaurin, nintedanib, bortezomib, crizotinib, ibrutinib, gefitinib, methotrexate, fludarabine, pazopanib, anagrelide, etoposide, busulfan, dasatinib, teniposide, nilotinib, sunitinib, sonidegib, everolimus, daunorubicin, irinotecan, dactinomycin
LIPID MODIFYING AGENTS	C10	0.0213612	0.354744	0.536164	1.55663	144	23	atorvastatin, ezetimibe, lovastatin, acipimox, bezafibrate, simvastatin, fluvastatin, cerivastatin, amlodipine, gemfibrozil
PSYCHOLEPTICS	N05	0.0251068	0.354744	0.427701	1.47749	187	54	asenapine, lorazepam, molindone, perphenazine, midazolam, nitrazepam, pimozide, remoxipride, iloperidone, tiapride, butalbital, chlorprothixene, quetiapine, loxapine, aripiprazole, droperidol, flupentixol, promazine, fluphenazine, pipamperone, trifluoperazine, thiothixene, thioridazine, triflupromazine
UROLOGICALS	G04	0.0388208	0.354744	-0.510989	-1.5471	132	17	phenazopyridine, apomorphine, darifenacin
MUSCLE RELAXANTS	M03	0.0432309	0.354744	-0.544797	-1.5525	151	14	baclofen, chlorzoxazone, chlormezanone, thiocolchicoside, pancuronium
AGENTS ACTING ON THE RENIN-ANGIOTENSIN SYSTEM	C09	0.044343	0.354744	0.505983	1.46901	300	23	fosinopril, benazepril, aliskiren, eprosartan, captopril, moexipril, hydrochlorothiazide, amlodipine, olmesartan, quinapril
ANTIBIOTICS AND CHEMOTHERAPEUTICS FOR DERMATOLOGICAL USE	D06	0.0762149	0.522617	0.505692	1.4089	504	19	sulfamethizole, demeclocycline, oxytetracycline
STOMATOLOGICAL PREPARATIONS	A01	0.105581	0.62413	-0.463693	-1.38005	366	16	miconazole, minocycline, neomycin
DIURETICS	C03	0.137447	0.62413	0.476005	1.31162	910	18	chlorothiazide, eplerenone, hydroflumethiazide, bendroflumethiazide, furosemide, hydrochlorothiazide, theobromine, torasemide, spironolactone, indapamide, trichlormethiazide
ANTIFUNGALS FOR DERMATOLOGICAL USE	D01	0.1484	0.62413	-0.413416	-1.29454	500	19	tioconazole, miconazole, econazole, tolnaftate, butenafine, bifonazole
ANTIVIRALS FOR SYSTEMIC USE	J05	0.161281	0.62413	0.434843	1.27333	1097	24	valaciclovir, famciclovir, ribavirin, maraviroc, rimantadine
DRUGS FOR FUNCTIONAL GASTROINTESTINAL DISORDERS	A03	0.164419	0.62413	0.480811	1.28446	1072	16	trimebutine, oxyphenonium, alosetron, isometheptene, cisapride, domperidone, metoclopramide, methantheline
ANTIPROTOZOALS	P01	0.169035	0.62413	0.444977	1.26671	1129	21	mefloquine, artemether, artesunate, tinidazole, quinine, nitazoxanide, clioquinol, pentamidine, suramin
ALL OTHER THERAPEUTIC PRODUCTS	V03	0.18801	0.644606	-0.447247	-1.24802	667	13	amifostine, pralidoxime, fomepizole, physostigmine, deferiprone
ANTI-ACNE PREPARATIONS	D10	0.225162	0.701391	-0.428157	-1.19475	799	13	isotretinoin, sulfacetamide, meclocycline, resorcinol, tretinoin
ANTIDIARRHEALS, INTESTINAL ANTIINFLAMMATORY/ANTIINFECTIVE AGENTS	A07	0.235329	0.701391	-0.384657	-1.18409	793	18	vancomycin, miconazole, neomycin, diphenoxylate
ANTIMYCOBACTERIALS	J04	0.248409	0.701391	-0.430945	-1.17653	897	12	sulfamethoxazole, ethionamide, trimethoprim, clofazimine, cycloserine
BETA BLOCKING AGENTS	C07	0.293638	0.705716	0.393384	1.1321	1979	22	timolol, carteolol, alprenolol, acebutolol, betaxolol, practolol, amlodipine, nadolol, nifedipine, celiprolol, oxprenolol, carvedilol
ANTIBACTERIALS FOR SYSTEMIC USE	J01	0.298973	0.705716	0.289264	1.09239	2386	92	sulfamethizole, demeclocycline, kanamycin, cefpodoxime, josamycin, pefloxacin, ticarcillin, oxacillin, flucloxacillin, roxithromycin, oxytetracycline, troleandomycin, sparfloxacin
ANTIEPILEPTICS	N03	0.303376	0.705716	0.417185	1.13231	1994	17	stiripentol, tiagabine, ethotoin, trimethadione
CORTICOSTEROIDS, DERMATOLOGICAL PREPARATIONS	D07	0.308751	0.705716	0.39406	1.12176	2063	21	desoximetasone, flumethasone, clocortolone, flurandrenolide, halcinonide, dexamethasone, diflorasone, prednicarbate, mometasone, alclometasone
ENDOCRINE THERAPY	L02	0.340144	0.712076	-0.370282	-1.07794	1181	15	enzalutamide, abiraterone
OPHTHALMOLOGICALS	S01	0.364502	0.712076	0.280638	1.05644	2907	90	sulfamethizole, cinchocaine, kanamycin, levobunolol, famciclovir, timolol, oxytetracycline, carteolol, ephedrine, emedastine, tetracaine, acetylcysteine, ketorolac, betaxolol, trifluridine, lomefloxacin
DRUGS FOR ACID RELATED DISORDERS	A02	0.385797	0.712076	0.391786	1.06337	2536	17	lansoprazole, esomeprazole, pirenzepine, tinidazole, pantoprazole
ANTIINFLAMMATORY AND ANTIRHEUMATIC PRODUCTS	M01	0.390402	0.712076	0.329691	1.04792	2765	35	parecoxib, nabumetone, esomeprazole, fenbufen, etodolac, tenoxicam, ketorolac, benzydamine, ibuprofen, acemetacin, nimesulide, oxyphenbutazone, oxaprozin, auranofin
ANTIHYPERTENSIVES	C02	0.399229	0.712076	-0.336414	-1.03558	1346	18	guanethidine, bosentan, mecamylamine
ANESTHETICS	N01	0.413207	0.712076	0.394537	1.03872	2696	15	cinchocaine, etomidate, tetracaine, propofol, prilocaine
THROAT PREPARATIONS	R02	0.415377	0.712076	0.431766	1.04677	2657	11	benzethonium, dequalinium, benzydamine, ibuprofen
GYNECOLOGICAL ANTIINFECTIVES AND ANTISEPTICS	G01	0.433521	0.717551	0.293996	1.02029	3240	56	sulfamethizole, chlorothiazide, ciclopirox, sulfadoxine, hydroflumethiazide, dequalinium, oxytetracycline, bendroflumethiazide, nystatin, furosemide, tinidazole, clioquinol, hydrochlorothiazide, sumatriptan, sulfaphenazole, probenecid
SEX HORMONES AND MODULATORS OF THE GENITAL SYSTEM	G03	0.473359	0.757375	0.353614	0.995792	3144	20	norgestimate, clomifene, estriol, norethisterone, testosterone, raloxifene, dydrogesterone, estradiol
ANTITHROMBOTIC AGENTS	B01	0.507831	0.786318	0.382162	0.968306	3274	13	cilostazol, rivaroxaban, dipyridamole, clopidogrel
ANTIPRURITICS, INCL. ANTIHISTAMINES, ANESTHETICS, ETC.	D04	0.541944	0.812917	0.372639	0.944176	3494	13	cinchocaine, tetracaine
ANTI-PARKINSON DRUGS	N04	0.577701	0.840292	0.334092	0.92058	3828	18	trihexyphenidyl, ropinirole, entacapone, safinamide, benzatropine
VASOPROTECTIVES	C05	0.611307	0.847777	0.339306	0.89331	3989	15	cinchocaine, tetracaine, dexamethasone, diltiazem
OTOLOGICALS	S02	0.618171	0.847777	0.320984	0.894284	4095	19	cinchocaine, flumethasone, clioquinol, dexamethasone
IMMUNOSUPPRESSANTS	L04	0.648626	0.864835	-0.323108	-0.856675	2336	11	methotrexate, tofacitinib, leflunomide, everolimus
OPHTHALMOLOGICAL AND OTOLOGICAL PREPARATIONS	S03	0.693866	0.900151	-0.310249	-0.822582	2499	11	neomycin
OTHER GYNECOLOGICALS	G02	0.829967	0.996142	0.290827	0.720161	5300	12	benzydamine, ibuprofen, fenoterol, lisuride, estradiol, cabergoline, misoprostol
CALCIUM CHANNEL BLOCKERS	C08	0.839743	0.996142	0.274265	0.722072	5480	15	amlodipine, diltiazem, isradipine, nifedipine, bepridil, verapamil, cilnidipine, nicardipine
TOPICAL PRODUCTS FOR JOINT AND MUSCULAR PAIN	M02	0.881995	0.996142	0.255072	0.692307	5799	17	etofenamate, benzydamine, ibuprofen, nimesulide, oxyphenbutazone
DRUGS FOR OBSTRUCTIVE AIRWAY DISEASES	R03	0.894217	0.996142	0.224931	0.699639	6246	32	ambroxol, theophylline, ephedrine, amlexanox, aminophylline, pentoxifylline, fenoterol, montelukast, theobromine, mometasone, pranlukast, fenspiride
ANALGESICS	N02	0.912643	0.996142	0.240294	0.662122	6048	18	diflunisal, ibuprofen, sumatriptan, tramadol, lisuride, clonidine
OTHER NERVOUS SYSTEM DRUGS	N07	0.953877	0.996142	0.220046	0.587842	6224	16	betahistine, nicotine, varenicline
PSYCHOANALEPTICS	N06	0.986518	0.996142	0.173394	0.570904	7097	42	protriptyline, memantine, milnacipran, desipramine, tranylcypromine, donepezil, dosulepin, fluvoxamine, reboxetine, trazodone, trimipramine, modafinil, minaprine, venlafaxine, imipramine, phenelzine, clomipramine, atomoxetine, citalopram, fluoxetine, doxepin, isocarboxazid, mirtazapine
ANTIHISTAMINES FOR SYSTEMIC USE	R06	0.987926	0.996142	0.175819	0.531557	6790	28	dexbrompheniramine, carbinoxamine, chlorcyclizine, desloratadine, terfenadine, levocetirizine, cyproheptadine, trimethobenzamide
NASAL PREPARATIONS	R01	0.99112	0.996142	0.179616	0.505807	6584	20	phenylpropanolamine, ephedrine, dexamethasone, naphazoline, mometasone, oxymetazoline, xylometazoline, olopatadine, levocabastine, mupirocin, budesonide
DRUGS USED IN DIABETES	A10	0.99306	0.996142	0.173725	0.478693	6581	18	simvastatin, rosiglitazone, nateglinide, tolazamide, phenformin, pioglitazone, acetohexamide, glimepiride, repaglinide, tolbutamide, rosuvastatin
CARDIAC THERAPY	C01	0.996142	0.996142	0.161583	0.505474	6971	33	metaraminol, dofetilide, ephedrine, mephentermine, ibuprofen
